# Supplementary material for: Improving cardiovascular disease risk communication in NHS Health Checks: a qualitative study
Source: PubMed Central journal article supplement (PMC6731822; doi:10.1136/bmjopen-2018-026058), 2019-09-03
Supplement: bmjopen-2018-026058.draft_revisions.pdf [file bmjopen-2018-026058.draft_revisions.pdf]

# BMJ Open

BMJ Open is committed to open peer review. As part of this commitment we make the peer review history of every article we publish publicly available.

When an article is published we post the peer reviewers' comments and the authors' responses online. We also post the versions of the paper that were used during peer review. These are the versions that the peer review comments apply to.

The versions of the paper that follow are the versions that were submitted during the peer review process. They are not the versions of record or the final published versions. They should not be cited or distributed as the published version of this manuscript.

BMJ Open is an open access journal and the full, final, typeset and author-corrected version of record of the manuscript is available on our site with no access controls, subscription charges or pay-per-view fees (<http://bmjopen.bmj.com>).

If you have any questions on BMJ Open's open peer review process please email [info.bmjopen@bmj.com](mailto:info.bmjopen@bmj.com)

# BMJ Open

## Improving cardiovascular disease risk communication in NHS Heath Checks: a qualitative study

|                               |                                                                                                                                                                                                                                                                                                                                                                                                                                                                                                                                                                                                                                                                      |
|-------------------------------|----------------------------------------------------------------------------------------------------------------------------------------------------------------------------------------------------------------------------------------------------------------------------------------------------------------------------------------------------------------------------------------------------------------------------------------------------------------------------------------------------------------------------------------------------------------------------------------------------------------------------------------------------------------------|
| Journal:                      | <i>BMJ Open</i>                                                                                                                                                                                                                                                                                                                                                                                                                                                                                                                                                                                                                                                      |
| Manuscript ID                 | bmjopen-2018-026058                                                                                                                                                                                                                                                                                                                                                                                                                                                                                                                                                                                                                                                  |
| Article Type:                 | Research                                                                                                                                                                                                                                                                                                                                                                                                                                                                                                                                                                                                                                                             |
| Date Submitted by the Author: | 14-Aug-2018                                                                                                                                                                                                                                                                                                                                                                                                                                                                                                                                                                                                                                                          |
| Complete List of Authors:     | Hawking, Meredith; Barts and The London School of Medicine and Dentistry, Centre for Primary Care and Public Health<br>Timmis, Adam; Bart's Heart Centre, NIHR Cardiovascular Biomedical Research Unit<br>Wilkins, Fae ; Barts and The London School of Medicine and Dentistry, Queen Mary University of London., Centre for Primary Care and Public Health<br>Potter, Jessica; Barts and The London School of Medicine and Dentistry, Queen Mary University of London, Centre for Primary Care and Public Health<br>Robson, John; Barts and The London School of Medicine and Dentistry, Queen Mary University of London, Centre for Primary Care and Public Health |
| Keywords:                     | PUBLIC HEALTH, PREVENTIVE MEDICINE, PRIMARY CARE, Information technology < BIOTECHNOLOGY & BIOINFORMATICS, Communication                                                                                                                                                                                                                                                                                                                                                                                                                                                                                                                                             |
|                               |                                                                                                                                                                                                                                                                                                                                                                                                                                                                                                                                                                                                                                                                      |

SCHOLARONE™  
Manuscripts

Only

## Improving cardiovascular disease risk communication in NHS Health Checks: a qualitative study

**Authors:** Hawking M.K.D, Timmis A, Wilkins F, Potter J.L, Robson J.

### Author details

Ms Meredith Kate Durof Hawking. MPH BSC Hons. Research Fellow<sup>1</sup>

Corresponding author: email: [m.k.d.hawking@qmul.ac.uk](mailto:m.k.d.hawking@qmul.ac.uk)

Prof Adam Timmis. MA MD FRCP. Professor of Clinical Cardiology<sup>2</sup>

Barts and the London School of Medicine and Dentistry, Barts Heart Centre EC1A 7BE

[a.d.timmis@qmul.ac.uk](mailto:a.d.timmis@qmul.ac.uk)

Ms Fae Wilkins. Facilitator<sup>1</sup>

Centre for Primary Care and Public Health, Queen Mary University London, 58 Turner Street, London E1 2AB

[f.wilkins@qmul.ac.uk](mailto:f.wilkins@qmul.ac.uk)

Dr Jessica L Potter MBBS BA MRCP. MRC Doctoral Fellow<sup>1</sup>

Centre for Primary Care and Public Health, Queen Mary University London, 58 Turner Street, London E1 2AB

[Jessica.potter@qmul.ac.uk](mailto:Jessica.potter@qmul.ac.uk)

Dr John Robson MD FRCGP. Reader<sup>1</sup>

Centre for Primary Care and Public Health, Queen Mary University London, 58 Turner Street, London E1 2AB

[j.robson@qmul.ac.uk](mailto:j.robson@qmul.ac.uk)

Tel: 0207 882 2553

1) Barts and The London School of Medicine and Dentistry, Queen Mary University London, 58 Turner Street, London E1 2AB

2) Barts and the London School of Medicine and Dentistry, Barts Heart Centre, London, EC1A 7BE

## Abstract

### Objective

To explore patient perspectives and experiences of a personalised Risk Report, designed to improve cardiovascular risk communication in the NHS Health Check.

### Design and Setting

Qualitative study with NHS Health Check attendees in three general practices in the London Borough of Newham.

### Intervention and participants

A personalised Risk Report for the NHS Health Check was developed to improve communication of results and advice. The Risk Report was embedded in the electronic health record, printed with auto-filled results, and used as a discussion aide during the NHS Health Check, and was a take-home record of information and advice on risk reduction for the attendees.

18 purposively sampled socially diverse participants took part in semi-structured interviews which were analysed thematically.

### Results

For most participants, the NHS Health Check was an opportunity for reassurance and assessment, and the Risk Report was an enduring record that supported risk understanding, with impact beyond the individual. For a minority, ambivalence towards the Risk Report occurred in the context of attending for other reasons, and risk and lifestyle advice were not internalised or acted upon.

### Conclusion

Our findings demonstrate the potential of a personalised Risk Report as a useful intervention in NHS Health Checks for enhancing patient understanding of cardiovascular risk and strategies for risk reduction. Also highlighted are the challenges that must be overcome to ensure transferability of these benefits to diverse patient groups.

### Strengths and weaknesses

- This study was carried out during routine delivery of the NHS Health Check programme and included socially diverse participants at low or moderate cardiovascular risk.
- The study was limited to delivery in a general practice setting and may not be generalisable to delivery in other settings.
- The risk report was only available in an English language version and may be less suitable for people who prefer another language.

## Introduction

The national NHS Health Checks programme, initiated in 2009 across England, is a publicly funded screening and prevention programme aiming to detect early signs of cardiovascular ill health amongst healthy 40-74 year olds in the general population.(1) Effective communication of cardiovascular disease (CVD) risk is a core element of this programme but previous qualitative research has suggested that patients struggle to understand risk in NHS Health Checks(2-4) and are dissatisfied with the lack of information provided.(5) A survey of patients found that over 70% recalled receiving lifestyle advice, but very few remembered receiving a CVD risk score and many incorrectly believed themselves to be low risk.(5) Research on attitudes of attendees and non-attendees called for consistent provision of tailored lifestyle information (6) and cited limited communication of risk and inadequate access to support services as prime concerns relevant across differing age groups, ethnic groups and social groups.(7, 8)

In East London the majority of NHS Health Checks are delivered by trained Health Care Assistants (HCAs), typically multi-lingual staff drawn from local communities.(9) At present in East London there is no formal, standardised mechanism for conveying CVD risk information other than verbal communication during the NHS Health Check itself.

To improve communication in NHS Health Checks, we developed an evidence based personalised NHS Health Check Risk Report, to be used both as a discussion aid and as an enduring record for patients to take away. This incorporated an infographic explanation of their CVD risk as well as findings from clinical tests and a personalised action plan. This paper reports on qualitative findings from a mixed methods feasibility trial of the Risk Report in general practice.

## Methods

### Development of the Risk Report

The Risk Report (Fig 1) was developed in line with national NHS Health Check programme guidelines and informed by the EAST framework,(10) risk communication literature and focus groups with HCAs, nurses and clinicians who are involved in the provision of Health Checks.

Input on implementation, content and design was gathered from general practitioners, specialist cardiologists and two informal focus groups with HCAs and nurses. Implementation barriers included: limited access to colour printers, high printing costs, and time taken to hand write documents, therefore most patients leave with no record of their results, the goals they have been set, or resources for achieving them. In response, the Risk Report was designed to be embedded and saved within the electronic health record (EHR), to be automatically populated with patient specific clinical information, easily printed off and discussed with the patient, and suitable for patients to take home.

### Public participation

The design of the risk report was informed by the literature on client responses to information and risk communication and modified in the light of responses by attendees during development and piloting. We did not directly involve members of the public in the design of the qualitative study or

1  
2  
3 its analysis. The qualitative interviews were designed to gain insight from participants into the  
4 delivery of improved methods of risk communication.  
5

### 6 **Content of the risk report**

7  
8 We shaped elements of the Risk Report around the four principles of the EAST framework: easy,  
9 attractive, social and timely.(10) *Easy*: embedding the Risk Report in the EHR and simple printing, cut  
10 'hassle and time factors'. Complex behavioural goals were simplified by breaking down complex  
11 goals into achievable steps and including supporting resources. *Attractive*: NHS branding was used to  
12 improve trustworthiness (11, 12) alongside infographics, personalisation and plain English wording.  
13 Health benefits of behaviour change were presented with alternative incentives to boost motivation  
14 to change. *Social*: Social norms messaging was used to motivate behaviour change and increase  
15 salience. The action planning section includes family and friends in goal setting, prompts discussion  
16 and encourages making a commitment to others. *Timely*: delivery of messages is optimal when in  
17 the appointment setting, but continues as patients reflect on and refer back to the report.  
18 Messaging highlights immediate as well as long term benefits of making behavioural changes.  
19

20  
21 The Risk Report includes QRISK2(13) and Heart Age (62) metrics to convey CVD risk, using  
22 infographics, icon arrays and pictorial natural frequencies with a common denominator to ease  
23 understanding and reduce denominator neglect.(14-17) Risk messages include a temporal  
24 component to provide context.(18) An infographic comparing comparative 'dread' risks is included  
25 to help patients situate their CVD risk alongside other causes of mortality.(19) We used survival  
26 framing to encourage risk-averse choices in terms of medication taking (20) and positive framing of  
27 messages to highlight alternative benefits of making healthy behaviours.(21) The Risk Report is  
28 printed in greyscale on four sides of A4 and includes information on local lifestyle change support  
29 services. It is available on-line at [https://www.qmul.ac.uk/blizard/ceg/resource-](https://www.qmul.ac.uk/blizard/ceg/resource-library/presentations/nhs-health-check-risk-report-oct-2017/)  
30 [library/presentations/nhs-health-check-risk-report-oct-2017/](https://www.qmul.ac.uk/blizard/ceg/resource-library/presentations/nhs-health-check-risk-report-oct-2017/)  
31  
32  
33

34 **[Insert fig 1 image of part of risk report]**

### 35 **Study design**

36  
37  
38 Nested qualitative interview study within a randomised feasibility trial. The study methods for the  
39 trial have been reported separately ([linked trial report](#)).  
40

### 41 **Recruitment and selection**

42  
43 Participants were recruited from three practices in the London Borough of Newham. Study  
44 information, consent form and an invitation to attend the NHS Health Check were provided in  
45 advance of recruitment. Participants gave written informed consent to take part in a qualitative  
46 interview at enrolment into the feasibility trial, and verbally prior to interview commencement.  
47

48  
49 Participants in the trial who had received the Risk Report within an NHS Health Check were  
50 purposively sampled following a maximum diversity sampling approach, according to four  
51 categories: age, gender, ethnic group and CVD risk score, and were then invited to interview. They  
52 were telephoned by the project administrator or a practice receptionist to schedule their  
53 appointment.  
54  
55  
56  
57  
58  
59  
60

## Data collection

The development of the topic guide [Box 1] was based on a literature review and was piloted at one of the practices. The topic guide used open questions and probes to gather more detail, and was adapted as new themes emerged. Single instance semi-structured interviews were undertaken in English, face to face in a private room at the practice by an experienced qualitative researcher (MKDH) with a background in public health and health communication. Participants no contact with the researcher before interview, and MKDH was introduced as a university researcher interested in improving NHS Health Checks. The Risk Report was introduced part way through the interview as a prompt and prop for discussion. Sessions lasted 10-40 minutes and were audio recorded, pseudonymised and then transcribed. Field notes were taken after each interview. Data collection occurred March 2016 – July 2017. Interviews commenced until saturation occurred and no new themes were arising.<sup>(22)</sup> Interviewees received a £20 shopping voucher for their time.

### Box 1: Topic Guide

- Early impressions of the NHS Health Check programme
- Motivations to attend/ accessibility
- Overall experience
- Key information/ messages
- Nurse/HCA communication
- Understanding risk

-----Introduce Risk Report-----

- General feedback (first impressions/ comprehensiveness etc.)
- Design
- Suggestions for improvement
- Risk information
- Lifestyle changes
- Further comments

## Analysis

Inductive thematic analysis of the qualitative data was undertaken,<sup>(23)</sup> which involved coding the transcripts according to latent and manifest content and developing a thematic framework.<sup>(23)</sup> Analysis by MKDH proceeded alongside data collection and NVIVO 10 software was used for data management.<sup>(24)</sup> 10% of transcripts were double coded by a second experienced qualitative researcher (JP). Attention was paid to the development of narratives within and across transcripts. Any inconsistencies were discussed and agreed amongst the research team to offer multiple perspectives on the development of codes and identification of themes, and overarching thematic connections.

## Results

### Sample Characteristics

18 respondents were well represented across gender, age group and self-defined ethnic group [Table 1]. Respondents at lower cardiovascular risk (QRisk2 score) were well represented but those at high risk were not represented in the sample.

| Group        | Gender |        | Age Group (years) |       |       | QRISK2 score (%) |          |            | Ethnicity by grouping     |                                      |                                                          |                       |
|--------------|--------|--------|-------------------|-------|-------|------------------|----------|------------|---------------------------|--------------------------------------|----------------------------------------------------------|-----------------------|
|              | Male   | Female | 40-50             | 51-60 | 60-74 | 10 or less       | 10 to 19 | 20 or more | White (British, European) | Black (British/African or Caribbean) | South Asian (Indian, Pakistani, Bangladeshi, Sri Lankan) | All other Ethnicities |
| Control      | 3      | 4      | 2                 | 4     | 1     | 6                | 1        | 0          | 0                         | 3                                    | 2                                                        | 2                     |
| Intervention | 9      | 3      | 2                 | 5     | 4     | 5                | 6        | 0          | 2                         | 5                                    | 4                                                        | 0                     |
| Totals       | 11     | 7      | 4                 | 9     | 5     | 11               | 7        | 0          | 2                         | 8                                    | 6                                                        | 2                     |

Table 1. Characteristics of sample

### Overview of themes

Our thematic framework resulted in the identification of four main themes, which are outlined in Table 2. On further interpretation we recognised two overarching threads in our data. These were patterns in the linking of themes. We discuss the findings within each theme and sub-theme before discussing how the themes link together.

Table 2 – Thematic framework

| Differing Motivations   | Multiple risks               | Risk Report as an enduring record | Impact             |
|-------------------------|------------------------------|-----------------------------------|--------------------|
|                         | Binary risk<br>Risk meanings |                                   |                    |
| Detecting disease       | Acceptance of risk           | 'Proof' of results                | Making changes     |
| Being a willing patient | Rejection of risk            | Ambivalency                       | Not making changes |



## 1. Differing Motivations

### Detecting disease

Most participant accounts of why they attended the NHS Health Check were underscored by a desire to check their fitness, or to screen for previously undetected disease, especially in the context of increasing age. This was framed as 'maintaining your health'

*"C101: Because I, I'm over 50 now, so I guess now is the right time to say you will have a check on your health, and try and see how fit you are."*

There was a sense that some interviewees wanted to be reassured 'just in case', with reported fears linked to having a family history of CVD or previous test results, such as high blood pressure results.

### Being a willing patient

Amongst a minority of interviewees, the reason they attended was out of a sense of obligation to the practice and to the NHS more generally. One participant wanted to be seen as a 'willing patient'. Another attended to make sure they did not get removed from the practice register.

*"C103: Probably to keep in with the practice, you know, showing that I was a good, energetic, willing patient."*

## 2. Multiple risks

There were multiple constructions of 'risk' in the interviews, reflecting the differences in participants' perceptions of their own health, whether they were concerned and whether or not there were language barriers during the health check.

### Binary risk

Those for whom English was not a first language mostly communicated their CVD risk in general, binary terms when asked, reporting that they were 'fine' or 'not at risk'. Risk for these interviewees was either a state of being 'at risk', or not. Percentage risk and/or heart age were not mentioned or discussed.

### Risk meanings

Those that discussed risk in terms of their risk scores applied different meanings and importance to QRisk and heart age. For instance, this participant was explaining how she would like to have known her QRisk score, because the two types of risk have different meanings for her:

*"C202: This [heart age] is good to look at, it makes me feel young and things like, oh yeah I'm healthy-ish but our heart age doesn't, it's nice but I would have liked to have known my [Q] risk, e... I think it would make you make more changes when you can actually see, OK, so I'm really at risk here [...] because even though it's 44 yeah, I don't know the risks."*

Most participants were quicker to remember and report their heart age spontaneously in comparison to their QRISK2 score.

### Acceptance of risk

Interviewees reacted to their CVD risk scores in varied ways based on their perceptions of their state of health before attending the check. Those who mentioned being concerned about their CVD health prior to attending the NHS Health Check were more likely to report their risk score and accept it as a 'true' reflection of their current state of health:

*"C204: And she told me about the age, like my heart is 54 years old when I'm just 51. Yeah, you don't reach, I wanted it to be lower [...] I'm going to try my best to bring it lower. That's what I'm trying to do right now."*

### Rejection of risk

Some participants already believed themselves to lead a healthy life or have a healthy heart and this meant that they disagreed with or discounted the CVD risk that was presented to them in the check if it did not fall in line with their own perception. For them, their risk was pre-defined by how they felt and saw themselves prior to the check:

*"C103: Yeah, now that was a bit odd actually because the first time she said that there was a 1 in 10 chance of me having a heart attack and I thought, well that just doesn't seem right, once I got home I thought, no, that really doesn't seem right [...] So that was a bit odd but I thought, I'm not going to have one [a CVD event] anyway. No. [laughs]"*

For these participants, their perception of not being 'at risk' was based on feeling healthy and leading a healthy life, a lack of symptoms or the belief that good health is bestowed by a higher power.

## 3. Risk Report as an enduring record

The Risk Report prompted participants to recall their CVD risk results. They found it to be 'user friendly' and clear with a good size font, no jargon and good for people for whom English was not their first language.

### 'Proof' of results

The majority of participants talked positively about the Risk Report as an enduring record of their results:

*"C202: I think I liked the bit of paper that they gave me at the end that just jots down everything because I think you forget really easily and that's been good to look back at."*

For some, this had additional meaning, as 'proof' and reassurance of their good health, as this quote describes:

*"C109: Having something positive as proof on a piece of paper, like you could actually, a physical piece of paper. I know it sounds silly right but having a, it's like, hey if the pain is still there, like I say, at least my heart's working properly."*

1  
2  
3 Participants reported looking back at the Risk Report to jog their memory. Some shared and  
4 discussed it with family and friends. Two reported keeping it by their bed, and some discussed how  
5 they would keep it to compare their results in future checks.  
6

7 *"C207: Some leaflets you can look at and throw it away but when you look at that box and*  
8 *you're look at it and you're thinking, oh yeah that's interesting. [...] Yeah, it does motivate*  
9 *you, as it has for me anyway, it really has."*  
10

### 11 **Ambivalency**

12  
13 A few interviewees were not interested in the Risk Report as a record at all, had not looked back at it  
14 or engaged with it:  
15

16 *"I: Did you get a leaflet [showing Risk Report] like that?"*

17  
18 *C205: Might be. I haven't opened it since. It might still be in the house."*  
19  
20

## 21 **4. Impact**

### 22 **Making changes**

23  
24 Most patients reported making at least small changes as a result of the NHS Health Check, such as  
25 incorporating more walks, reducing their salt and fat intake, and cutting down on alcohol  
26 consumption. A few participants had made significant changes – for instance one patient had begun  
27 exercising regularly, joined a gym with his partner, cut down on fried foods, avoided drinking strong  
28 spirits and begun smoking less, reporting his cholesterol reduced from 5.5 to 4.9 in three months.  
29  
30  
31

### 32 **Not making changes**

33  
34 There were a few patients who had not made any changes to their lifestyle after the Check. These  
35 tended to be patients who reported that they were low risk or who already felt they were in good  
36 health. One patient, who had a medium QRisk2 score, was pre-diabetic and had been referred on for  
37 further tests, had tried to make changes but did not manage to keep it up:  
38

39 *"C104: Well I want to but you've not got the go all the time, sometimes you just want to*  
40 *binge, what I do a lot. [...] The diet plans, my son printed some sheets off from work, what*  
41 *you're supposed to be eating, but you'd do it for a few days and then you put them in a*  
42 *drawer."*  
43  
44

45 Another patient had also been referred on for more tests to investigate his glucose levels but had  
46 not attended the referral clinic. He clearly understood his risk and what had been asked of him,  
47 however did not change his behavior according to the NHS Health Check results and  
48 recommendations:  
49

50 *"C205: I was supposed to go for that check up [...] And I didn't go for that. [...] As long as I can*  
51 *still run and walk and I don't have pains and aches and dizzy spells as they like to call them. I*  
52 *don't. I don't worry."*  
53

### 54 **Wider impact**

1  
2  
3 It was clear from the interviews that there was a wider social impact of NHS Health Checks that went  
4 beyond individuals. This included sharing the information from the Check with others, family  
5 members being included in diet and exercise changes, as well as recommendations to family and  
6 friends that they should attend their NHS Health Check.  
7

8 *“C202: So now I have to look at my diet and actually even for my children as well, and look*  
9 *at their diet and just think, is it necessary, do we need all this salt, and I do really like salt and*  
10 *we are like a salty family. I would just add salt to everything and now I’m starting to think*  
11 *that I can’t.”*  
12

13 *“C207: I showed her [wife] and yeah and I’ve looked at it and it’s when we go shopping now*  
14 *we, we probably have more vegetables and fruits in our shopping trolley than we have of all*  
15 *crisps.”*  
16  
17  
18  
19

## 20 **5. Bringing the themes together**

21 The majority of participants’ accounts played out according to the main thematic findings described  
22 above. Participants attended their NHS Health Check to assess their levels of fitness and to get  
23 reassurance that nothing was wrong, or because they were concerned about previous tests or  
24 predisposition to ill-health. They accepted the level of risk that the screening assigned to them, and  
25 viewed the Risk Report as a positive enduring record of their health status. They then went on to  
26 make lifestyle changes and share these with their families.  
27  
28

29 A minority of participant accounts in the study followed a different narrative from the central  
30 themes. These participants attended out of obligation or duty rather than concern for their health.  
31 They did not readily accept or internalise risk scores that differed from their own assessments of  
32 being healthy. They were ambivalent towards the Risk Report and did not make advised lifestyle  
33 changes. These diverse cases were few but are important for our consideration and recognition.  
34  
35  
36  
37

## 38 **Discussion**

### 39 **Summary**

40 For most, the NHS Health Check was an opportunity for reassurance and assessment, and the Risk  
41 Report was an enduring record that supported risk understanding, and supported lifestyle change  
42 for the individual and their wider social networks. For a minority, ambivalence towards the Risk  
43 Report occurred in the context of attending for other reasons, and risk and lifestyle advice were not  
44 internalised or acted upon.  
45  
46  
47

### 48 **Strengths and Limitations**

49 Our sample included medium and low CVD risk participants from a range of ethnic groups and ages,  
50 reflecting the Newham population, of whom the majority are low to medium risk.<sup>(9)</sup> Many low to  
51 medium risk patients are unlikely to receive further clinical referrals as a result of the NHS Health  
52 Check, and as such, the Risk Report may be the only intervention that they receive.  
53  
54  
55  
56  
57  
58  
59

1  
2  
3 Our findings may not be transferrable to those who do not take up the offer of the NHS Health  
4 Check, nor those who do not speak English. The inclusion of four patients for whom English was not  
5 their first language was pragmatic and reflects routine care in many areas, where health care  
6 professionals must communicate with patients about CVD risk regardless of language barriers and  
7 without the assistance of professional translators. Specific adaptations to the Risk Report and the  
8 NHS Health Check programme are required to extend the programme more equitably to all types of  
9 patient groups.  
10

### 11 **Comparison with Existing literature**

12  
13 Familial experience with CVD (25) and concerns about preventable or undetected illness as  
14 motivators to attend (26, 27) have been reported elsewhere. Some participants in our study  
15 presented due to specific concerns, such as high blood pressure, supporting Perry's assertion that it  
16 is not only the 'worried well' who attend.(4) Burgess and colleagues (28) found civic responsibility to  
17 be a driver for some patients, which falls in line with being seen as a 'willing patient'. This study  
18 builds on these findings by aligning motivations to attend with the ongoing experiences of having a  
19 health check.  
20  
21

22  
23 One key finding was the notion of CVD risk as a binary category, rather than a percentage scale. The  
24 'take home message' from the NHS Health Check was often limited to dualistic generalities like being  
25 'fine' or 'not at risk'. Whether people at higher CVD risk receive meaningful information and people  
26 at lower CVD risk are not falsely reassured should be a key focus of research in this area. The  
27 concept of an "MOT", or 'roadworthiness'(29) - used prominently in the advertising of some NHS  
28 Checks - in which some people 'pass' – and presumably need take no further action - and the others  
29 'fail' may not be the most effective message to convey. van Steenkiste and colleagues (30) found  
30 that communicated test results faded into an 'overall reassuring message' instead of specific results.  
31 Numerically, most heart attacks and strokes occur in people at moderate CVD risk, so if health  
32 checks are to be successful the focus must remain on the importance of reducing the burden of CVD  
33 in all patients, not just those at high risk. Challenging the 'MOT' metaphor associated with the  
34 overall programme may also help in this regard.  
35  
36  
37

38  
39 A key finding of our study was the ways in which patients used the Risk Report to not only motivate  
40 their own lifestyle changes, but as a way to prompt and support discussions and changes with others  
41 in their family and broader social networks. This finding has been mirrored in ethnographic work in a  
42 community health check setting, where Afro-Caribbean participants went on to discuss their results  
43 with peers.(25) In our study the 'work' of becoming healthier was a shared endeavor, involving those  
44 around the 'patient', including older relatives and children. Information impacted beyond the person  
45 through social practices such as eating and being physically active. Moving away from an  
46 individualistic approach to examine shared practices in the aftermath of health checks may be a  
47 fruitful area for future research.  
48

49  
50 The majority of participant views aligned with the dominant biomedical risk narrative behind  
51 screening for preventable illness in the UK. This viewpoint places the responsibility for maintaining  
52 health to the individual, via 'correct' lifestyle choices.(31) Having an NHS Health Check feeds this  
53 narrative by offering the opportunity for reassurance and provision of guidance to make small  
54 changes to maintain or protect health from uncertainty, or risk. However, we found a minority of  
55 participants did not engage with the risk element of the NHS Health Checks, or intend to make  
56  
57  
58  
59

1  
2  
3 lifestyle changes as a result of having a check, instead they attended for other reasons and were  
4 ambivalent about the risk report and the idea of 'improving' their health. These patients are often  
5 characterised as 'non-attenders' without an attempt to explore their worldview.(32, 33) Models of  
6 continuous care, characterised by trusting clinician-patient relationships (34) and attention to  
7 patient narratives (35) may allow for better ways of communicating about cardiovascular ill-health  
8 with patients whose perspectives do not align with the dominant biomedical narrative. Additionally,  
9 qualitative attention to the whole patient and their journey through the NHS Health Check and  
10 beyond could help identify alternative ways of delivering good care for these groups of patients.  
11  
12

### 13 **Implications for research and practice**

14  
15 Our qualitative results support further development of a Risk Report for NHS Health Checks, to  
16 enhance risk communication and support lifestyle modification and dissemination of messages  
17 amongst wider social networks. Our findings also highlight some of the challenges faced by the NHS  
18 Health Check programme for supporting patients whose ideas about risk and screening for future  
19 illness don't align with NHS and preventative public health priorities. Shifting the focus of the NHS  
20 Health Checks beyond the individual, to consider how networks of family and friends might interact,  
21 may have positive influences for leading healthier lives.  
22  
23  
24  
25  
26  
27  
28  
29

### 30 **Additional information**

#### 31 **Funding**

32  
33 This study was funded by The Guttman Academic Partnership hosted by UCLPartners. Meredith  
34 K.D. Hawking was in part supported by the National Institute for Health Research (NIHR)  
35 Collaboration for Leadership in Applied Health Research and Care (CLAHRC) North Thames at Bart's  
36 Health NHS Trust.  
37  
38

#### 39 **Ethical Approval**

40  
41 The study received final approval from the National Research Ethics Service Committee North West  
42 (Preston) on 7/8/2015. The research ethics committee reference was: 15/NW/0635 (protocol  
43 number MCPH1C8R). The study was registered with ClinicalTrials.gov (NCT02486913).  
44

#### 45 **Competing Interests**

46  
47 MKDH, JLP, AT and FW have no interests to declare. JR has a non-pecuniary interest as a co-author of  
48 QRisk2 and also a member of a national NHS Health Check advisory group.  
49

#### 50 **Acknowledgements**

51  
52 We are grateful to the NHS Health Check attendees for giving up their time and sharing their  
53 experiences and for the cooperation and support from general practitioners and the clinic staff who  
54 were involved in the study and those who helped inform the development of the Risk Report.  
55

#### 56 **Contributorship**

1  
2  
3 MKHD led the design of the risk report and with AT and JR designed the qualitative study. FW  
4 organised the recruitment of practices, staff training and participant attendance. MHKD carried out  
5 the interviews and analysed the transcripts with JLP. All authors contributed to the manuscript.  
6  
7  
8  
9  
10  
11

## 12 References

- 14 1. DOH. Putting Prevention First – NHS Health Check: Vascular Risk Assessment and  
15 Management Best Practice Guidance. London: Department of Health; 2009.
- 16 2. Baker C, Loughren EA, Crone D, Kallfa N. Patients' perceptions of a NHS Health Check in the  
17 primary care setting. *Quality in primary care*. 2014;22(5):232-7.
- 18 3. Riley R, Coghill N, Montgomery A, Feder G, Horwood J. Experiences of patients and  
19 healthcare professionals of NHS cardiovascular health checks: a qualitative study. *Journal of public  
20 health (Oxford, England)*. 2016;38(3):543-51.
- 21 4. Perry C, Thurston M, Alford S, Cushing J, Panter L. The NHS health check programme in  
22 England: a qualitative study. *Health promotion international*. 2016;31(1):106-15.
- 23 5. Krska J, du Plessis R, Chellaswamy H. Views and experiences of the NHS Health Check  
24 provided by general medical practices: cross-sectional survey in high-risk patients. *Journal of Public  
25 Health*. 2015;37(2):210-7.
- 26 6. McNaughton RJ, Shucksmith J. Reasons for (non)compliance with intervention following  
27 identification of 'high-risk' status in the NHS Health Check programme. *Journal of public health  
28 (Oxford, England)*. 2015;37(2):218-25.
- 29 7. Ismail H, Atkin K. The NHS Health Check programme: insights from a qualitative study of  
30 patients. *Health Expect*. 2016;19(2):345-55.
- 31 8. Shaw RL, Lowe H, Holland C, Pattison H, Cooke R. GPs' perspectives on managing the NHS  
32 Health Check in primary care: a qualitative evaluation of implementation in one area of England.  
33 *BMJ open*. 2016;6(7):e010951.
- 34 9. Robson J, Dostal I, Madurasinghe V, Sheikh A, Hull S, Boomla K, et al. The NHS Health Check  
35 programme: implementation in east London 2009–2011. *BMJ open*. 2015;5(4).
- 36 10. Service OH, M.; Halpern, D.; Algate, F.; Gallagher, R.; Nguyen, S.; Ruda, S.; Sanders, M.;  
37 Pelenur, M.; Gyani, A.; Harper, H.; Reinhard, J.; Kirkman, E. EAST: Four ways to apply behavioural  
38 insights. London: Behavioural Insights Ltd; 2014.
- 39 11. Powell J, Inglis N, Ronnie J, Large S. The Characteristics and Motivations of Online Health  
40 Information Seekers: Cross-Sectional Survey and Qualitative Interview Study. *J Med Internet Res*.  
41 2011;13(1):e20.
- 42 12. Quiroz-Aitken M, Cunningham-Burley S, Pagliari C. Moving from Trust to Trustworthiness:  
43 Experiences of public engagement in the Scottish Health Informatics Programme. *Science and Public  
44 Policy*. 2016.
- 45 13. Hippisley-Cox J, Coupland C, Vinogradova Y, Robson J, Minhas R, Sheikh A, et al. Predicting  
46 cardiovascular risk in England and Wales: prospective derivation and validation of QRISK2. *BMJ*.  
47 2008;336(7659):1475.
- 48  
49  
50  
51  
52  
53  
54  
55  
56  
57  
58  
59  
60



14. Kurz-Milcke E, Gigerenzer G, Martignon L. Transparency in risk communication: graphical and analog tools. *Annals of the New York Academy of Sciences*. 2008;1128:18-28.
15. Goodyear-Smith F, Arroll B, Chan L, Jackson R, Wells S, Kenealy T. Patients prefer pictures to numbers to express cardiovascular benefit from treatment. *Annals of family medicine*. 2008;6(3):213-7.
16. Garcia-Retamero R, Galesic M, Gigerenzer G. Do icon arrays help reduce denominator neglect? *Med Decis Making*. 2010;30(6):672-84.
17. Galesic M, Garcia-Retamero R, Gigerenzer G. Using icon arrays to communicate medical risks: overcoming low numeracy. *Health psychology : official journal of the Division of Health Psychology, American Psychological Association*. 2009;28(2):210-6.
18. Waldron CA, van der Weijden T, Ludt S, Gallacher J, Elwyn G. What are effective strategies to communicate cardiovascular risk information to patients? A systematic review. *Patient Educ Couns*. 2011;82(2):169-81.
19. Gigerenzer G. Dread risk, September 11, and fatal traffic accidents. *Psychological science*. 2004;15(4):286-7.
20. Veldwijk J, Essers BAB, Lambooi MS, Dirksen CD, Smit HA, de Wit GA. Survival or Mortality: Does Risk Attribute Framing Influence Decision-Making Behavior in a Discrete Choice Experiment? *Value in Health*. 2016;19(2):202-9.
21. Akl EA, Oxman AD, Herrin J, Vist GE, Terrenato I, Sperati F, et al. Framing of health information messages. *The Cochrane database of systematic reviews*. 2011(12):Cd006777.
22. Mason M. Sample Size and Saturation in PhD Studies Using Qualitative Interviews. 2010. 2010;11(3).
23. Braun V, Clarke V. Using thematic analysis in psychology. *Qualitative Research in Psychology*. 2006;3(2):77-101.
24. QSR, International, Pty, Ltd. NVivo Qualitative Data Analysis Software Version 10. 2012.
25. Riley R, Coghill N, Montgomery A, Feder G, Horwood J. The provision of NHS health checks in a community setting: an ethnographic account. *BMC health services research*. 2015;15:546.
26. Ellis N, Gidlow C, Cowap L, Randall J, Iqbal Z, Kumar J. A qualitative investigation of non-response in NHS health checks. *Archives of Public Health*. 2015;73(1):1-8.
27. Jenkinson CE, Asprey A, Clark CE, Richards SH. Patients' willingness to attend the NHS cardiovascular health checks in primary care: a qualitative interview study. *BMC Fam Pract*. 2015;16:33.
28. Burgess C, Wright AJ, Forster AS, Dodhia H, Miller J, Fuller F, et al. Influences on individuals' decisions to take up the offer of a health check: a qualitative study. *Health Expect*. 2015;18(6):2437-48.
29. Shaw RL, Pattison HM, Holland C, Cooke R. Be SMART: examining the experience of implementing the NHS Health Check in UK primary care. *BMC Fam Pract*. 2015;16:1.
30. van Steenkiste B, van der Weijden T, Timmermans D, Vaes J, Stoffers J, Grol R. Patients' ideas, fears and expectations of their coronary risk: barriers for primary prevention. *Patient Education and Counseling*. 2004;55(2):301-7.
31. Lupton D. Risk as Moral Danger: The Social and Political Functions of Risk Discourse in Public Health. *International Journal of Health Services*. 1993;23(3):425-35.



- 1  
2  
3 32. Dalton A, Bottle R, Okoro C, Majeed F, Millett C. Uptake of the NHS health checks  
4 programme in a deprived, culturally diverse setting: cross sectional study. *J Epidemiol Commun H.*  
5 2011;65.  
6  
7 33. Dryden R, Williams B, McCowan C, Themessl-Huber M. What do we know about who does  
8 and does not attend general health checks? findings from a narrative scoping review. *BMC Public*  
9 *Health.* 2012;12.  
10  
11 34. Robb N, Greenhalgh T. "You have to cover up the words of the doctor": The mediation of  
12 trust in interpreted consultations in primary care. *Journal of Health Organization and Management.*  
13 2006;20(5):434-55.  
14  
15 35. Greenhalgh T, Collard A, Campbell-Richards D, Vijayaraghavan S, Malik F, Morris J, et al.  
16 Storylines of Self-Management: Narratives of People with Diabetes from a Multiethnic Inner City  
17 Population. *Journal of Health Services Research & Policy.* 2011;16(1):37-43.  
18  
19  
20  
21  
22  
23  
24  
25  
26  
27  
28  
29  
30  
31  
32  
33  
34  
35  
36  
37  
38  
39  
40  
41  
42  
43  
44  
45  
46  
47  
48  
49  
50  
51  
52  
53  
54  
55  
56  
57  
58  
59  
60

1  
2  
3  
4  
5  
6  
7  
8  
9  
10  
11  
12  
13  
14  
15  
16  
17  
18  
19  
20  
21  
22  
23  
24  
25  
26  
27  
28  
29  
30  
31  
32  
33  
34  
35  
36  
37  
38  
39  
40  
41  
42  
43  
44  
45  
46  
47  
48  
49  
50  
51  
52  
53  
54  
55  
56  
57  
58  
59  
60

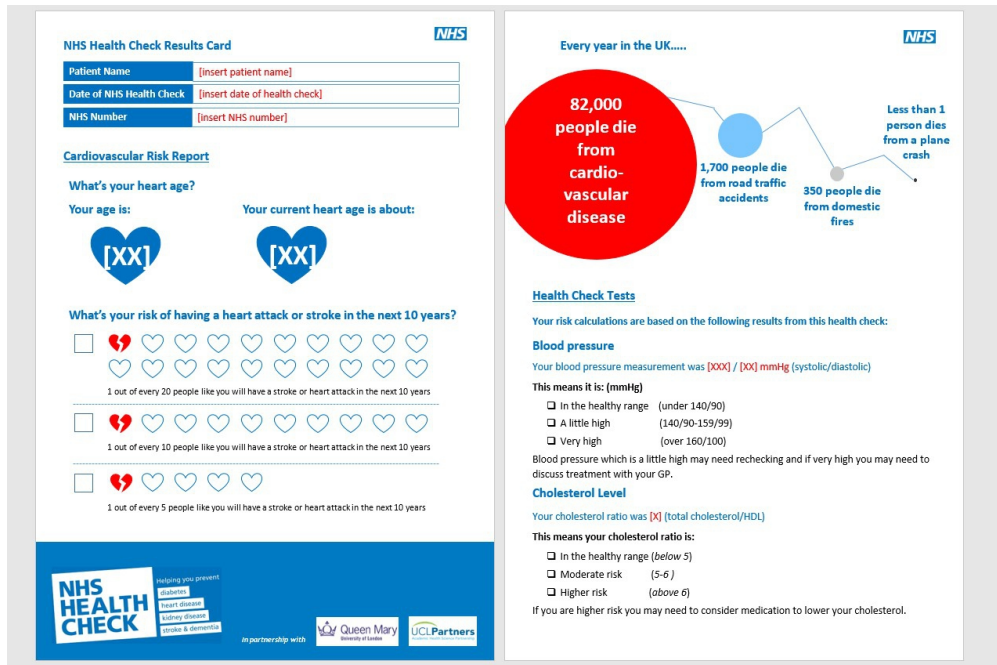

Figure 1. Section of risk report

337x223mm (96 x 96 DPI)

**Table 1**

Consolidated criteria for reporting qualitative studies (COREQ): 32-item checklist

| No                                                 | Item                     | Guide questions/description                                 |                                                                                          |
|----------------------------------------------------|--------------------------|-------------------------------------------------------------|------------------------------------------------------------------------------------------|
| <b>Domain 1:<br/>Research team and reflexivity</b> |                          |                                                             |                                                                                          |
| Personal Characteristics                           |                          |                                                             |                                                                                          |
| 1.                                                 | Interviewer/facilitator  | Which author/s conducted the interview or focus group?      | MKHD                                                                                     |
| 2.                                                 | Credentials              | What were the researcher's credentials? <i>E.g. PhD, MD</i> | MPH, BSc                                                                                 |
| 3.                                                 | Occupation               | What was their occupation at the time of the study?         | Research assistant                                                                       |
| 4.                                                 | Gender                   | Was the researcher male or female?                          | F                                                                                        |
| 5.                                                 | Experience and training  | What experience or training did the researcher have?        | Training in qualitative research and previous experience in health related communication |
| Relationship with participants                     |                          |                                                             |                                                                                          |
| 6.                                                 | Relationship established | Was a relationship established prior to study commencement? | No                                                                                       |

| No                            | Item                                     | Guide questions/description                                                                                                                                     |                                                                                                                                      |
|-------------------------------|------------------------------------------|-----------------------------------------------------------------------------------------------------------------------------------------------------------------|--------------------------------------------------------------------------------------------------------------------------------------|
| 7.                            | Participant knowledge of the interviewer | What did the participants know about the researcher?<br><i>e.g. personal goals, reasons for doing the research</i>                                              | Participants were informed that MKHD was a university researcher conducting a study                                                  |
| 8.                            | Interviewer characteristics              | What characteristics were reported about the interviewer/facilitator?<br><i>e.g. Bias, assumptions, reasons and interests in the research topic</i>             | Informed MKHD was interested in improving NHS Health Checks                                                                          |
| <b>Domain 2: study design</b> |                                          |                                                                                                                                                                 |                                                                                                                                      |
| Theoretical framework         |                                          |                                                                                                                                                                 |                                                                                                                                      |
| 9.                            | Methodological orientation and Theory    | What methodological orientation was stated to underpin the study? <i>e.g. grounded theory, discourse analysis, ethnography, phenomenology, content analysis</i> | Inductive thematic analysis with coding of transcripts according to latent and manifest content and developing a thematic framework. |
| Participant selection         |                                          |                                                                                                                                                                 |                                                                                                                                      |
| 10.                           | Sampling                                 | How were participants selected? <i>e.g. purposive, convenience, consecutive, snowball</i>                                                                       | Purposive maximum diversity sample                                                                                                   |

| No              | Item                         | Guide questions/description                                                              |                                                                                                                                                              |
|-----------------|------------------------------|------------------------------------------------------------------------------------------|--------------------------------------------------------------------------------------------------------------------------------------------------------------|
| 11.             | Method of approach           | How were participants approached? <i>e.g. face-to-face, telephone, mail, email</i>       | Mail and face to face                                                                                                                                        |
| 12.             | Sample size                  | How many participants were in the study?                                                 | 18                                                                                                                                                           |
| 13.             | Non-participation            | How many people refused to participate or dropped out? Reasons?                          | None                                                                                                                                                         |
| Setting         |                              |                                                                                          |                                                                                                                                                              |
| 14.             | Setting of data collection   | Where was the data collected? <i>e.g. home, clinic, workplace</i>                        | General practice clinic                                                                                                                                      |
| 15.             | Presence of non-participants | Was anyone else present besides the participants and researchers?                        | No one                                                                                                                                                       |
| 16.             | Description of sample        | What are the important characteristics of the sample? <i>e.g. demographic data, date</i> | Demographic                                                                                                                                                  |
| Data collection |                              |                                                                                          |                                                                                                                                                              |
| 17.             | Interview guide              | Were questions, prompts, guides provided by the authors? Was it pilot tested?            | Pilot tested<br>The topic guide used open questions and probes to gather more detail, and was adapted as new themes emerged. Single instance semi-structured |

| No                                     | Item                           | Guide questions/description                                              |                                       |
|----------------------------------------|--------------------------------|--------------------------------------------------------------------------|---------------------------------------|
|                                        |                                |                                                                          | interviews were undertaken in English |
| 18.                                    | Repeat interviews              | Were repeat interviews carried out? If yes, how many?                    | No                                    |
| 19.                                    | Audio/visual recording         | Did the research use audio or visual recording to collect the data?      | Yes audio recording                   |
| 20.                                    | Field notes                    | Were field notes made during and/or after the interview or focus group?  | Yes                                   |
| 21.                                    | Duration                       | What was the duration of the interviews or focus group?                  | 10-40 minutes                         |
| 22.                                    | Data saturation                | Was data saturation discussed?                                           | Yes                                   |
| 23.                                    | Transcripts returned           | Were transcripts returned to participants for comment and/or correction? | No                                    |
| <b>Domain 3: analysis and findings</b> |                                |                                                                          |                                       |
| Data analysis                          |                                |                                                                          |                                       |
| 24.                                    | Number of data coders          | How many data coders coded the data?                                     | 2                                     |
| 25.                                    | Description of the coding tree | Did authors provide a description of the coding tree?                    | Yes                                   |

| No        | Item                         | Guide questions/description                                                                                                                 |                                     |
|-----------|------------------------------|---------------------------------------------------------------------------------------------------------------------------------------------|-------------------------------------|
| 26.       | Derivation of themes         | Were themes identified in advance or derived from the data?                                                                                 | Yes                                 |
| 27.       | Software                     | What software, if applicable, was used to manage the data?                                                                                  | NVIVO 10                            |
| 28.       | Participant checking         | Did participants provide feedback on the findings?                                                                                          | No                                  |
| Reporting |                              |                                                                                                                                             |                                     |
| 29.       | Quotations presented         | Were participant quotations presented to illustrate the themes / findings? Was each quotation identified?<br><i>e.g. participant number</i> | Yes; each participant is identified |
| 30.       | Data and findings consistent | Was there consistency between the data presented and the findings?                                                                          | Yes                                 |
| 31.       | Clarity of major themes      | Were major themes clearly presented in the findings?                                                                                        | Yes                                 |
| 32.       | Clarity of minor themes      | Is there a description of diverse cases or discussion of minor themes?                                                                      | Yes                                 |

# BMJ Open

## Improving cardiovascular disease risk communication in NHS Health Checks: a qualitative study

|                                 |                                                                                                                                                                                                                                                                                                                                                                                                                                                                                                                                                                                                                                                                      |
|---------------------------------|----------------------------------------------------------------------------------------------------------------------------------------------------------------------------------------------------------------------------------------------------------------------------------------------------------------------------------------------------------------------------------------------------------------------------------------------------------------------------------------------------------------------------------------------------------------------------------------------------------------------------------------------------------------------|
| Journal:                        | <i>BMJ Open</i>                                                                                                                                                                                                                                                                                                                                                                                                                                                                                                                                                                                                                                                      |
| Manuscript ID                   | bmjopen-2018-026058.R1                                                                                                                                                                                                                                                                                                                                                                                                                                                                                                                                                                                                                                               |
| Article Type:                   | Research                                                                                                                                                                                                                                                                                                                                                                                                                                                                                                                                                                                                                                                             |
| Date Submitted by the Author:   | 25-Mar-2019                                                                                                                                                                                                                                                                                                                                                                                                                                                                                                                                                                                                                                                          |
| Complete List of Authors:       | Hawking, Meredith; Barts and The London School of Medicine and Dentistry, Centre for Primary Care and Public Health<br>Timmis, Adam; Bart's Heart Centre, NIHR Cardiovascular Biomedical Research Unit<br>Wilkins, Fae ; Barts and The London School of Medicine and Dentistry, Queen Mary University of London., Centre for Primary Care and Public Health<br>Potter, Jessica; Barts and The London School of Medicine and Dentistry, Queen Mary University of London, Centre for Primary Care and Public Health<br>Robson, John; Barts and The London School of Medicine and Dentistry, Queen Mary University of London, Centre for Primary Care and Public Health |
| <b>Primary Subject Heading</b>: | Public health                                                                                                                                                                                                                                                                                                                                                                                                                                                                                                                                                                                                                                                        |
| Secondary Subject Heading:      | Communication, Qualitative research, Public health, General practice / Family practice, Cardiovascular medicine                                                                                                                                                                                                                                                                                                                                                                                                                                                                                                                                                      |
| Keywords:                       | PUBLIC HEALTH, PREVENTIVE MEDICINE, PRIMARY CARE, Information technology < BIOTECHNOLOGY & BIOINFORMATICS, Communication                                                                                                                                                                                                                                                                                                                                                                                                                                                                                                                                             |
|                                 |                                                                                                                                                                                                                                                                                                                                                                                                                                                                                                                                                                                                                                                                      |

SCHOLARONE™  
Manuscripts



## Improving cardiovascular disease risk communication in NHS Health Checks: a qualitative study

**Authors:** Hawking M.K.D, Timmis A, Wilkins F, Potter J.L, Robson J.

### Author details

Ms Meredith Kate Durolf Hawking. MPH BSC Hons. Research Fellow<sup>1</sup>

Corresponding author: email: [m.k.d.hawking@qmul.ac.uk](mailto:m.k.d.hawking@qmul.ac.uk)

Prof Adam Timmis. MA MD FRCP. Professor of Clinical Cardiology<sup>2</sup>

Barts and the London School of Medicine and Dentistry, Barts Heart Centre EC1A 7BE

[a.d.timmis@qmul.ac.uk](mailto:a.d.timmis@qmul.ac.uk)

Ms Fae Wilkins. Facilitator<sup>1</sup>

Centre for Primary Care and Public Health, Queen Mary University London, 58 Turner Street, London

E1 2AB

[f.wilkins@qmul.ac.uk](mailto:f.wilkins@qmul.ac.uk)

Dr Jessica L Potter MBBS BA MRCP. MRC Doctoral Fellow<sup>1</sup>

Centre for Primary Care and Public Health, Queen Mary University London, 58 Turner Street, London

E1 2AB

[Jessica.potter@qmul.ac.uk](mailto:Jessica.potter@qmul.ac.uk)

Dr John Robson MD FRCGP. Reader<sup>1</sup>

Centre for Primary Care and Public Health, Queen Mary University London, 58 Turner Street, London

E1 2AB

[j.robson@qmul.ac.uk](mailto:j.robson@qmul.ac.uk)

Tel: 0207 882 2553

1) Barts and The London School of Medicine and Dentistry, Queen Mary University London,  
58 Turner Street, London E1 2AB

2) Barts and the London School of Medicine and Dentistry, Barts Heart Centre, London, EC1A 7BE

## Abstract

### Objective

The NHS Health Check programme is a public screening and prevention initiative in England to detect early signs of cardiovascular ill health amongst healthy adults. We aimed to explore patient perspectives and experiences of a personalised Risk Report, designed to improve cardiovascular risk communication in the NHS Health Check.

### Design and Setting

Qualitative study with NHS Health Check attendees in three general practices in the London Borough of Newham.

### Intervention and participants

A personalised Risk Report for the NHS Health Check was developed to improve communication of results and advice. The Risk Report was embedded in the electronic health record, printed with auto-filled results, and used as a discussion aide during the NHS Health Check, and was a take-home record of information and advice on risk reduction for the attendees.

18 purposively sampled socially diverse participants took part in semi-structured interviews which were analysed thematically.

### Results

For most participants, the NHS Health Check was an opportunity for reassurance and assessment, and the Risk Report was an enduring record that supported risk understanding, with impact beyond the individual. For a minority, ambivalence towards the Risk Report occurred in the context of attending for other reasons, and risk and lifestyle advice were not internalised or acted upon.

### Conclusion

Our findings demonstrate the potential of a personalised Risk Report as a useful intervention in NHS Health Checks for enhancing patient understanding of cardiovascular risk and strategies for risk reduction. Also highlighted are the challenges that must be overcome to ensure transferability of these benefits to diverse patient groups.

### Strengths and weaknesses

- This study was carried out during routine delivery of the NHS Health Check programme and included socially diverse participants at low or moderate cardiovascular risk.
- The study was limited to delivery in a general practice setting and may not be transferable to delivery in other settings.
- The risk report was only available in an English language version and may be less suitable for people who prefer another language.

## Introduction

The national NHS Health Checks programme, initiated in 2009 across England, is a publicly funded screening and prevention programme aiming to detect early signs of cardiovascular ill health amongst healthy 40-74 year olds in the general population.(1) Effective communication of cardiovascular disease (CVD) risk is a core element of this programme but previous qualitative research has suggested that patients struggle to understand risk in NHS Health Checks(2-4) and are dissatisfied with the lack of information provided.(5) A survey of patients found that over 70% recalled receiving lifestyle advice, but very few remembered receiving a CVD risk score and many incorrectly believed themselves to be low risk.(5) Research on attitudes of attendees and non-attendees called for consistent provision of tailored lifestyle information (6) and cited limited communication of risk and inadequate access to support services as prime concerns relevant across differing age groups, ethnic groups and social groups.(7, 8)

In East London the majority of NHS Health Checks are delivered by trained Health Care Assistants (HCAs), typically multi-lingual staff drawn from local communities.(9) At present in East London there is no formal, standardised mechanism for conveying CVD risk information other than verbal communication during the NHS Health Check itself.

To improve communication in NHS Health Checks, we developed an evidence based personalised NHS Health Check Risk Report, to be used both as a discussion aid and as an enduring record for patients to take away. This incorporated an infographic explanation of their CVD risk as well as findings from clinical tests and a personalised action plan. This paper reports on qualitative findings from a mixed methods feasibility trial of the Risk Report in general practice.

## Methods

### Development of the Risk Report

The Risk Report (figure 1) was developed in line with national NHS Health Check programme guidelines and informed by the EAST framework,(10) risk communication literature and focus groups with HCAs, nurses and clinicians who are involved in the provision of Health Checks.

Input on implementation, content and design was gathered from general practitioners, specialist cardiologists and two informal focus groups with HCAs and nurses. Implementation barriers included: limited access to colour printers, high printing costs, and time taken to hand write documents, therefore most patients leave with no record of their results, the goals they have been set, or resources for achieving them. In response, the Risk Report was designed to be embedded and saved within the electronic health record (EHR), to be automatically populated with patient specific clinical information, easily printed off and discussed with the patient, and suitable for patients to take home.

### Public involvement

Patients/ the public were not directly involved in the research planning or delivery process, including research question, recruitment, data collection or analysis. The design of the risk report was

1  
2  
3 informed by the literature on client responses to information and risk communication and, as this  
4 was a feasibility study, modified in the light of responses by study participants. The qualitative  
5 interviews were designed to gain insight from participants into the delivery of improved methods of  
6 risk communication.  
7  
8

### 9 **Content of the Risk Report**

10  
11 We shaped elements of the Risk Report around the four principles of the EAST framework: easy,  
12 attractive, social and timely.<sup>(10)</sup> *Easy*: embedding the Risk Report in the EHR and simple printing, cut  
13 'hassle and time factors'. Complex behavioural goals were simplified by breaking down complex  
14 goals into achievable steps and including supporting resources. *Attractive*: NHS branding was used to  
15 improve trustworthiness (11, 12) alongside infographics, personalisation and plain English wording.  
16 Health benefits of behaviour change were presented with alternative incentives to boost motivation  
17 to change. *Social*: Social norms messaging was used to motivate behaviour change and increase  
18 salience. The action planning section includes family and friends in goal setting, prompts discussion  
19 and encourages making a commitment to others. *Timely*: delivery of messages is optimal when in  
20 the appointment setting, but continues as patients reflect on and refer back to the report.  
21 Messaging highlights immediate as well as long term benefits of making behavioural changes.  
22  
23

24  
25 The Risk Report includes QRISK2<sup>(13)</sup> and Heart Age (14) metrics to convey CVD risk, using  
26 infographics, icon arrays and pictorial natural frequencies with a common denominator to ease  
27 understanding and reduce denominator neglect.<sup>(15-18)</sup> Risk messages include a temporal  
28 component to provide context.<sup>(19)</sup> An infographic comparing comparative 'dread' risks is included  
29 to help patients situate their CVD risk alongside other causes of mortality.<sup>(20)</sup> We used survival  
30 framing to encourage risk-averse choices in terms of medication taking (21) and positive framing of  
31 messages to highlight alternative benefits of making healthy behaviours.<sup>(22)</sup> The Risk Report is  
32 printed in greyscale on four sides of A4 and includes information on local lifestyle change support  
33 services. It is available to view in full in the supplementary file.  
34  
35  
36  
37

### 38 **Study design**

39  
40 Nested qualitative interview study within a randomised feasibility trial. A completed COREQ  
41 checklist for this study is available in the supplementary file.  
42

### 43 **Recruitment and selection**

44  
45 People aged 40-64 years due to be invited for an NHS Health Check were identified from six general  
46 practices in Newham, East London were invited to attend two checks, 3-6 months apart. A list of 250  
47 patients were randomly allocated to intervention or control groups. The study code denoting  
48 assignment group was then entered in the GP record to identify these patients to the HCPs. The  
49 intervention group received a printed NHS Health Check risk report with a verbal explanation of its  
50 contents at the first check, and the control group received usual care without written advice at the  
51 first check and the risk report with a verbal explanation of its contents at the second check, following  
52 a waiting list control method. Patients in either group were eligible for the qualitative study after  
53 they had undertaken the two checks and received the risk report in either the first or second check.  
54  
55  
56

57  
58 Participants were recruited from three practices, out of six in the wider feasibility trial. Study  
59 information, consent form and an invitation to attend the NHS Health Check were provided in  
60 advance of recruitment. Participants gave written informed consent to take part in a qualitative

interview at enrolment into the feasibility trial, and again verbally prior to interview commencement.

Participants were purposively sampled according to the information held in the electronic health record following a maximum diversity sampling approach, according to four categories. These were: age, gender, ethnic group and CVD risk score (QRISK2(13)). QRISK2 score was categorised as low (a score of 10 or less), medium (score: 10-19) or high risk (score of 20 or more) according to the cut offs used by the NHS Health Check programme. Ethnicity as reported within the medical record were grouped into the following categories: white (British, European), black (Black (British/ African or Caribbean), South Asian (Indian, Pakistani, Bangladeshi, Sri Lankan), and all other ethnicities. Patients were telephoned and invited to participate by the project administrator or a practice receptionist.

### Data collection

The development of the topic guide (box 1) was based on a literature review and was piloted at one of the practices. The topic guide used open questions and probes to gather more detail, and was adapted as new themes emerged. Single instance semi-structured interviews were undertaken in English, face to face in a private room at the practice by an experienced female qualitative researcher (MKDH) with a background in public health and health communication. Participants had no contact with the researcher before interview, and MKDH was introduced as a university researcher interested in improving NHS Health Checks. The Risk Report was introduced part way through the interview as a prompt and prop for discussion. Sessions lasted 10-40 minutes and were audio recorded, pseudonymised and then transcribed. Reflective field notes were taken after each interview. Data collection occurred March 2016 – July 2017, as part of the wider trial which took place March 2016 – December 2017. Interviews commenced until saturation occurred and no new themes were arising.(23) Interviewees received a £20 shopping voucher for their time.

#### Box 1: Topic Guide

- Early impressions of the NHS Health Check programme
- Motivations to attend/ accessibility
- Overall experience
- Key information/ messages
- Nurse/ HCA communication
- Understanding risk

-----Introduce Risk Report-----

- General feedback (first impressions/ comprehensiveness etc.)
- Design
- Suggestions for improvement
- Risk information
- Lifestyle changes
- Further comments

**Analysis**

Inductive thematic analysis of the qualitative data was undertaken,(24) which involved coding the transcripts according to latent and manifest content and developing a thematic framework.(24) Analysis by MKDH proceeded alongside data collection and NVIVO 10 software was used for data management.(25) 10% of transcripts were double coded by a second experienced qualitative researcher (JP). Attention was paid to the development of narratives within and across transcripts. Any inconsistencies were discussed and agreed amongst the research team to offer multiple perspectives on the development of codes and identification of themes, and overarching thematic connections.

**Results**

**Sample Characteristics**

18 respondents were well represented across gender, age group and self-defined ethnic group [Table 1]. Respondents at lower cardiovascular risk (QRISK2 score) were well represented but those at high risk were not represented in the sample. Of those approached, none refused to take part in the interview.

*Table 1: Characteristics of sample*

| Group        | Gender |        | Age Group (years) |       |       | QRISK2 score (%) |          |            | Ethnicity by grouping     |                                       |                                                          |                       |
|--------------|--------|--------|-------------------|-------|-------|------------------|----------|------------|---------------------------|---------------------------------------|----------------------------------------------------------|-----------------------|
|              | Male   | Female | 40-50             | 51-60 | 60-74 | 10 or less       | 10 to 19 | 20 or more | White (British, European) | Black (British/ African or Caribbean) | South Asian (Indian, Pakistani, Bangladeshi, Sri Lankan) | All other Ethnicities |
| Control      | 3      | 4      | 2                 | 4     | 1     | 6                | 1        | 0          | 0                         | 3                                     | 2                                                        | 2                     |
| Intervention | 8      | 3      | 2                 | 5     | 4     | 5                | 6        | 0          | 2                         | 5                                     | 4                                                        | 0                     |
| Totals       | 11     | 7      | 4                 | 9     | 5     | 11               | 7        | 0          | 2                         | 8                                     | 6                                                        | 2                     |

**Overview of themes**

Our thematic framework resulted in the identification of four main themes, which are outlined in Table 2. On further interpretation we recognised two overarching threads in our data. These were patterns in the linking of themes. We discuss the findings within each theme and sub-theme before discussing how the themes link together.

*Table 2: Thematic framework*

| Differing Motivations   | Multiple risks               | Risk Report as an enduring record | Impact             |
|-------------------------|------------------------------|-----------------------------------|--------------------|
|                         | Binary risk<br>Risk meanings |                                   |                    |
| Detecting disease       | Acceptance of risk           | ‘Proof’ of results                | Making changes     |
| Being a willing patient | Rejection of risk            | Ambivalency                       | Not making changes |

## 1. Differing Motivations

### Detecting disease

Most participant accounts of why they attended the NHS Health Check were underscored by a desire to check their fitness, or to screen for previously undetected disease, especially in the context of increasing age. This was framed as ‘maintaining your health’.

*“C101: Because I, I’m over 50 now, so I guess now is the right time to say you will have a check on your health, and try and see how fit you are.”*

There was a sense that some interviewees wanted to be reassured ‘just in case’, with reported fears linked to having a family history of CVD or previous test results, such as high blood pressure results.

### Being a willing patient

Amongst a minority of interviewees, the reason they attended was out of a sense of obligation to the practice and to the NHS more generally. One participant wanted to be seen as a ‘willing patient’. Another attended to make sure they did not get removed from the practice register.

*“C103: Probably to keep in with the practice, you know, showing that I was a good, energetic, willing patient.”*

## 2. Multiple risks

There were multiple constructions of ‘risk’ in the interviews, reflecting the differences in participants’ perceptions of their own health, whether they were concerned and whether or not there were language barriers during the health check.

### Binary risk

Those for whom English was not a first language mostly communicated their CVD risk in general, binary terms when asked, reporting that they were ‘fine’ or ‘not at risk’. Risk for these interviewees was either a state of being ‘at risk’, or not. Percentage risk and/or heart age were not mentioned or discussed.

### Risk meanings

Those that discussed risk in terms of their risk scores applied different meanings and importance to QRISK2 and heart age. For instance, this participant was explaining how she would like to have known her QRISK2 score, because the two types of risk have different meanings for her:

*“C202: This [heart age] is good to look at, it makes me feel young and things like, oh yeah I’m healthy-ish but our heart age doesn’t, it’s nice but I would have liked to have known my [Q] risk, e... I think it would make you make more changes when you can actually see, OK, so I’m really at risk here [...] because even though it’s 44 yeah, I don’t know the risks.”*



1  
2  
3 Most participants were quicker to remember and report their heart age spontaneously in  
4 comparison to their QRISK2 score.  
5

### 6 **Acceptance of risk**

7  
8 Interviewees reacted to their CVD risk scores in varied ways based on their perceptions of their state  
9 of health before attending the check. Those who mentioned being concerned about their CVD health  
10 prior to attending the NHS Health Check were more likely to report their risk score and accept it as a  
11 ‘true’ reflection of their current state of health:  
12

13  
14 *“C204: And she told me about the age, like my heart is 54 years old when I’m just 51. Yeah,*  
15 *you don’t reach, I wanted it to be lower [...] I’m going to try my best to bring it lower. That’s*  
16 *what I’m trying to do right now.”*  
17

### 18 **Rejection of risk**

19  
20 Some participants already believed themselves to lead a healthy life or have a healthy heart and this  
21 meant that they disagreed with or discounted the CVD risk that was presented to them in the check  
22 if it did not fall in line with their own perception. For them, their risk was pre-defined by how they  
23 felt and saw themselves prior to the check:  
24

25  
26 *“C103: Yeah, now that was a bit odd actually because the first time she said that there was a*  
27 *1 in 10 chance of me having a heart attack and I thought, well that just doesn’t seem right,*  
28 *once I got home I thought, no, that really doesn’t seem right [...] So that was a bit odd but I*  
29 *thought, I’m not going to have one [a CVD event] anyway. No. [laughs]”*  
30  
31

32 For these participants, their perception of not being ‘at risk’ was based on feeling healthy and  
33 leading a healthy life, a lack of symptoms or the belief that good health is bestowed by a higher  
34 power.  
35

## 36 **3. Risk Report as an enduring record**

37  
38 The Risk Report prompted participants to recall their CVD risk results. First impressions of the risk  
39 report were positive, as this example shows:  
40

41  
42 *“C110: I thought this was quite interesting, straightaway got the message across, the risk levels and*  
43 *things.”*  
44

45  
46 Participants found it to be ‘user friendly’ and clear with a good size font, no jargon and good for  
47 people for whom English was not their first language, or for those without a ‘scientific’ background.  
48

49  
50 *“C109: I’d just assume if my mother-in-Law came and did this, this would be just right for her.*  
51 *Whereas, yeah if, if there was another person with a scientific background, we might suggest even*  
52 *more [information] but yeah, I think that was enough.”*  
53 **‘Proof’ of results**  
54

55 The majority of participants talked positively about the Risk Report as an enduring record of their  
56 results:  
57

58  
59 *“C202: I think I liked the bit of paper that they gave me at the end that just jots down*  
60 *everything because I think you forget really easily and that’s been good to look back at.”*



1  
2  
3 For some, this had additional meaning, as ‘proof’ and reassurance of their good health, as this quote  
4 describes:  
5

6 *“C109: Having something positive as proof on a piece of paper, like you could actually, a*  
7 *physical piece of paper. I know it sounds silly right but having a, it’s like, hey if the pain is still*  
8 *there, like I say, at least my heart’s working properly.”*  
9

10  
11 Participants reported looking back at the Risk Report to jog their memory. Some shared and  
12 discussed it with family and friends. Two reported keeping it by their bed, and some discussed how  
13 they would keep it to compare their results in future checks.  
14

15 *“C207: Some leaflets you can look at and throw it away but when you look at that box and*  
16 *you’re look at it and you’re thinking, oh yeah that’s interesting. [...] Yeah, it does motivate*  
17 *you, as it has for me anyway, it really has.”*  
18  
19

## 20 **Ambivalency**

21  
22 A few interviewees were not interested in the Risk Report as a record at all, had not looked back at it  
23 or engaged with it:  
24

25 *“I: Did you get a leaflet [showing Risk Report] like that?”*  
26

27 *C205: Might be. I haven’t opened it since. It might still be in the house.”*  
28  
29  
30

## 31 **4. Impact**

### 32 **Making changes**

33  
34 Most patients reported making at least small changes as a result of the NHS Health Check, such as  
35 incorporating more walks, reducing their salt and fat intake, and cutting down on alcohol  
36 consumption. A few participants had made significant changes – for instance one patient had begun  
37 exercising regularly, joined a gym with his partner, cut down on fried foods, avoided drinking strong  
38 spirits and begun smoking less, reporting his cholesterol reduced from 5.5 to 4.9 in three months.  
39  
40  
41

### 42 **Not making changes**

43  
44 There were a few patients who had not made any changes to their lifestyle after the Check. These  
45 tended to be patients who reported that they were low risk or who already felt they were in good  
46 health. One patient, who had a medium QRISK2 score, was pre-diabetic and had been referred on  
47 for further tests, had tried to make changes but did not manage to keep it up:  
48  
49

50 *“C104: Well I want to but you’ve not got the go all the time, sometimes you just want to*  
51 *binge, what I do a lot. [...] The diet plans, my son printed some sheets off from work, what*  
52 *you’re supposed to be eating, but you’d do it for a few days and then you put them in a*  
53 *drawer.”*  
54

55  
56 Another patient had also been referred on for more tests to investigate his glucose levels but had  
57 not attended the referral clinic. He clearly understood his risk and what had been asked of him,  
58 however did not change his behavior according to the NHS Health Check results and  
59 recommendations:  
60

1  
2  
3  
4  
5  
6  
7  
8  
9  
10  
11  
12  
13  
14  
15  
16  
17  
18  
19  
20  
21  
22  
23  
24  
25  
26  
27  
28  
29  
30  
31  
32  
33  
34  
35  
36  
37  
38  
39  
40  
41  
42  
43  
44  
45  
46  
47  
48  
49  
50  
51  
52  
53  
54  
55  
56  
57  
58  
59  
60

*“C205: I was supposed to go for that check up [...] And I didn't go for that. [...] As long as I can still run and walk and I don't have pains and aches and dizzy spells as they like to call them. I don't. I don't worry.”*

### **Wider impact**

It was clear from the interviews that there was a wider social impact of NHS Health Checks that went beyond individuals. This included sharing the information from the Check with others, family members being included in diet and exercise changes, as well as recommendations to family and friends that they should attend their NHS Health Check.

*“C202: So now I have to look at my diet and actually even for my children as well, and look at their diet and just think, is it necessary, do we need all this salt, and I do really like salt and we are like a salty family. I would just add salt to everything and now I'm starting to think that I can't.”*

*“C207: I showed her [wife] and yeah and I've looked at it and it's when we go shopping now we, we probably have more vegetables and fruits in our shopping trolley than we have of all crisps.”*

## **5. Bringing the themes together**

The majority of participants' accounts played out according to the main thematic findings described above. Participants attended their NHS Health Check to assess their levels of fitness and to get reassurance that nothing was wrong, or because they were concerned about previous tests or predisposition to ill-health. They accepted the level of risk that the screening assigned to them, and viewed the Risk Report as a positive enduring record of their health status. They then went on to make lifestyle changes and share these with their families.

A minority of participant accounts in the study followed a different narrative from the central themes. These participants attended out of obligation or duty rather than concern for their health. They did not readily accept or internalise risk scores that differed from their own assessments of being healthy. They were ambivalent towards the Risk Report and did not make advised lifestyle changes. These diverse cases were few but are important for our consideration and recognition.

## **Discussion**

### **Summary**

This study sought to explore patient experiences of a personalised Risk Report, designed to improve cardiovascular risk communication in the NHS Health Check. For most, the NHS Health Check was an opportunity for reassurance and assessment, and the Risk Report was an enduring record that supported risk understanding, and supported lifestyle change for the individual and their wider social networks. For a minority, ambivalence towards the Risk Report occurred in the context of attending for other reasons, and risk and lifestyle advice were not internalised or acted upon.

### **Strengths and Limitations**

1  
2  
3 Our sample included medium and low CVD risk participants from a range of ethnic groups and ages,  
4 reflecting the Newham population, of whom the majority are low to medium risk.(9) Due to the  
5 targeted delivery approach adopted in the local area and high uptake rates in this area,(9) at the  
6 time of the study a large proportion of high risk patients had already been identified and referred for  
7 further specialist services and support. In contrast, many low to medium risk patients are unlikely to  
8 receive further clinical referrals as a result of the NHS Health Check, and as such, the Risk Report  
9 may be the only intervention that they receive. This group are therefore most likely to benefit from  
10 the action planning and further resources sections provided within the risk report, and are an  
11 appropriate target group for this intervention, and as the focus of this study. The majority (16/18) of  
12 participants in this study were from black and ethnic minority (BME) backgrounds, which reflects in  
13 part the diversity of the population in Newham Borough. Whilst this is an encouraging start, further  
14 adaptation may be required to tailor particular elements of the risk report for diverse population  
15 groups and cultural backgrounds.

16  
17 Our findings may not be transferrable to those who do not take up the offer of the NHS Health  
18 Check, nor those who do not speak English. Participants were recruited from a wider feasibility trial,  
19 and so were patients who had both consented to the check and to take part in research. Participants  
20 were from both control and intervention groups, but, as both received the risk report either at the  
21 first check or the second (3 months apart), and patients were not aware which group they were  
22 allocated to, this may not have had a big impact on the data we collected. The inclusion of four  
23 patients for whom English was not their first language was pragmatic and reflects routine care in  
24 many areas, where health care professionals must communicate with patients about CVD risk  
25 regardless of language barriers and without the assistance of professional translators. Our finding  
26 that risk is constructed as 'binary' as a result of language barriers, even in the presence of a risk  
27 report with explanatory graphics, shows how risk is constructed in a fundamentally different way in  
28 comparison to numerical constructions of risk used by patients without those communication  
29 barriers. The impact this has on perceptions of health and health outcomes amongst this group  
30 warrants further investigation. Specific adaptations to the Risk Report and the NHS Health Check  
31 itself are required to extend the programme more equitably to all types of patient groups.

### 40 **Comparison with Existing literature**

41  
42 Familial experience with CVD (26) and concerns about preventable or undetected illness as  
43 motivators to attend (27, 28) have been reported elsewhere. Some participants in our study  
44 presented due to specific concerns, such as high blood pressure, supporting Perry's assertion that it  
45 is not only the 'worried well' who attend.(4) Burgess and colleagues (29) found civic responsibility to  
46 be a driver for some patients, which falls in line with being seen as a 'willing patient'. This study  
47 builds on these findings by aligning motivations to attend with the ongoing experiences of having a  
48 health check.

49  
50 One key finding was the notion of CVD risk as a binary category, rather than a percentage scale. The  
51 'take home message' from the NHS Health Check was often limited to dualistic generalities like being  
52 'fine' or 'not at risk'. Whether people at higher CVD risk receive meaningful information and people  
53 at lower CVD risk are not falsely reassured should be a key focus of research in this area. The  
54 concept of an "MOT", or 'roadworthiness'(30) - used prominently in the advertising of some NHS  
55 Checks - in which some people 'pass' – and presumably need take no further action - and the others  
56 'fail' may not be the most effective message to convey. van Steenkiste and colleagues (31) found

1  
2  
3 that communicated test results faded into an 'overall reassuring message' instead of specific results.  
4 Numerically, most heart attacks and strokes occur in people at moderate CVD risk, so if health  
5 checks are to be successful the focus must remain on the importance of reducing the burden of CVD  
6 in all patients, not just those at high risk. Challenging the 'MOT' metaphor associated with the  
7 overall programme may also help in this regard.  
8  
9

10 A key finding of our study was the ways in which patients used the Risk Report to not only motivate  
11 their own lifestyle changes, but as a way to prompt and support discussions and changes with others  
12 in their family and broader social networks. This finding has been mirrored in ethnographic work in a  
13 community health check setting, where Afro-Caribbean participants went on to discuss their results  
14 with peers.(26) In our study the 'work' of becoming healthier was a shared endeavor, involving those  
15 around the 'patient', including older relatives and children. Information impacted beyond the person  
16 through social practices such as eating and being physically active. Moving away from an  
17 individualistic approach to examine shared practices in the aftermath of health checks may be a  
18 fruitful area for future research.  
19  
20  
21

22 The majority of participant views aligned with the dominant biomedical risk narrative behind  
23 screening for preventable illness in the UK. This viewpoint places the responsibility for maintaining  
24 health to the individual, via 'correct' lifestyle choices.(32) Having an NHS Health Check feeds this  
25 narrative by offering the opportunity for reassurance and provision of guidance to make small  
26 changes to maintain or protect health from uncertainty, or risk. However, we found a minority of  
27 participants did not engage with the risk element of the NHS Health Checks, or intend to make  
28 lifestyle changes as a result of having a check, instead they attended for other reasons and were  
29 ambivalent about the risk report and the idea of 'improving' their health. These patients are often  
30 characterised as 'non-attenders' without an attempt to explore their worldview.(33, 34) Models of  
31 continuous care, typified by trusting clinician-patient relationships (35) and attention to patient  
32 narratives (36) may allow for better ways of communicating about cardiovascular ill-health with  
33 patients whose perspectives do not align with the dominant biomedical narrative. Additionally,  
34 qualitative attention to the whole patient and their journey through the NHS Health Check and  
35 beyond could help identify alternative ways of delivering good care for these groups of patients.  
36  
37  
38  
39  
40

#### 41 **Implications for research and practice**

42  
43 Our qualitative results support further development of a Risk Report for NHS Health Checks, to  
44 enhance risk communication and support lifestyle modification and dissemination of messages  
45 amongst wider social networks. Our findings also highlight some of the challenges faced by the NHS  
46 Health Check programme for supporting patients whose ideas about risk and screening for future  
47 illness don't align with NHS and preventative public health priorities. Shifting the focus of the NHS  
48 Health Checks beyond the individual, to consider how networks of family and friends might interact,  
49 may have positive influences for leading healthier lives.  
50  
51  
52  
53  
54  
55  
56  
57  
58

#### 59 **Additional information**

## Funding

This study was funded by The Guttman Academic Partnership hosted by UCLPartners. Meredith K.D. Hawking was in part supported by the National Institute for Health Research (NIHR) Collaboration for Leadership in Applied Health Research and Care North Thames at Bart's Health NHS Trust (NIHR CLAHRC North Thames). The views expressed in this article are those of the author(s) and not necessarily those of the NHS, the NIHR, or the Department of Health and Social Care.

## Ethical Approval

The study received final approval from the National Research Ethics Service Committee North West (Preston) on 7/8/2015. The research ethics committee reference was: 15/NW/0635 (protocol number MCPH1C8R). The study was registered with ClinicalTrials.gov (NCT02486913).

## Competing Interests

MKDH, JLP, AT and FW have no interests to declare. JR has a non-pecuniary interest as a co-author of QRISK2 and is also a member of a national NHS Health Check advisory group.

## Acknowledgements

We are grateful to the NHS Health Check attendees for giving up their time to take part in the study and share their experiences. We also extend our thanks for the cooperation and support from general practitioners and the clinic staff who were involved in delivering the study and those who helped inform the development of the Risk Report.

## Contributorship

MKDH led the design of the risk report and with AT and JR designed the qualitative study. FW organised the recruitment of practices, IT components, staff training and participant attendance. MKDH carried out the interviews and analysed the transcripts with JLP. All authors contributed to the manuscript. Patients/ the public were not directly involved in the research process.

## Data sharing statement

No data are available. We did not seek ethical approval or patient consent for the full transcripts to be shared beyond the research team.

## References

1. DOH. Putting Prevention First – NHS Health Check: Vascular Risk Assessment and Management Best Practice Guidance. London: Department of Health; 2009.
2. Baker C, Loughren EA, Crone D, Kallfa N. Patients' perceptions of a NHS Health Check in the primary care setting. *Quality in primary care*. 2014;22(5):232-7.
3. Riley R, Coghill N, Montgomery A, Feder G, Horwood J. Experiences of patients and healthcare professionals of NHS cardiovascular health checks: a qualitative study. *Journal of public health (Oxford, England)*. 2016;38(3):543-51.

4. Perry C, Thurston M, Alford S, Cushing J, Panter L. The NHS health check programme in England: a qualitative study. *Health promotion international*. 2016;31(1):106-15.
5. Krska J, du Plessis R, Chellaswamy H. Views and experiences of the NHS Health Check provided by general medical practices: cross-sectional survey in high-risk patients. *Journal of Public Health*. 2015;37(2):210-7.
6. McNaughton RJ, Shucksmith J. Reasons for (non)compliance with intervention following identification of 'high-risk' status in the NHS Health Check programme. *Journal of public health (Oxford, England)*. 2015;37(2):218-25.
7. Ismail H, Atkin K. The NHS Health Check programme: insights from a qualitative study of patients. *Health Expect*. 2016;19(2):345-55.
8. Shaw RL, Lowe H, Holland C, Pattison H, Cooke R. GPs' perspectives on managing the NHS Health Check in primary care: a qualitative evaluation of implementation in one area of England. *BMJ open*. 2016;6(7):e010951.
9. Robson J, Dostal I, Madurasinghe V, Sheikh A, Hull S, Boomla K, et al. The NHS Health Check programme: implementation in east London 2009–2011. *BMJ open*. 2015;5(4).
10. Service OH, M.; Halpern, D.; Algate, F.; Gallagher, R.; Nguyen, S.; Ruda, S.; Sanders, M.; Pelenur, M.; Gyani, A.; Harper, H.; Reinhard, J.; Kirkman, E. EAST: Four ways to apply behavioural insights. London: Behavioural Insights Ltd; 2014.
11. Powell J, Inglis N, Ronnie J, Large S. The Characteristics and Motivations of Online Health Information Seekers: Cross-Sectional Survey and Qualitative Interview Study. *J Med Internet Res*. 2011;13(1):e20.
12. Quiroz-Aitken M, Cunningham-Burley S, Pagliari C. Moving from Trust to Trustworthiness: Experiences of public engagement in the Scottish Health Informatics Programme. *Science and Public Policy*. 2016.
13. Hippisley-Cox J, Coupland C, Vinogradova Y, Robson J, Minhas R, Sheikh A, et al. Predicting cardiovascular risk in England and Wales: prospective derivation and validation of QRISK2. *BMJ*. 2008;336(7659):1475.
14. JBS3. Joint British Societies' consensus recommendations for the prevention of cardiovascular disease (JBS3). *Heart*. 2014;100(Suppl 2):ii1.
15. Kurz-Milcke E, Gigerenzer G, Martignon L. Transparency in risk communication: graphical and analog tools. *Annals of the New York Academy of Sciences*. 2008;1128:18-28.
16. Goodyear-Smith F, Arroll B, Chan L, Jackson R, Wells S, Kenealy T. Patients prefer pictures to numbers to express cardiovascular benefit from treatment. *Annals of family medicine*. 2008;6(3):213-7.
17. Garcia-Retamero R, Galesic M, Gigerenzer G. Do icon arrays help reduce denominator neglect? *Med Decis Making*. 2010;30(6):672-84.
18. Galesic M, Garcia-Retamero R, Gigerenzer G. Using icon arrays to communicate medical risks: overcoming low numeracy. *Health psychology : official journal of the Division of Health Psychology, American Psychological Association*. 2009;28(2):210-6.
19. Waldron CA, van der Weijden T, Ludt S, Gallacher J, Elwyn G. What are effective strategies to communicate cardiovascular risk information to patients? A systematic review. *Patient Educ Couns*. 2011;82(2):169-81.
20. Gigerenzer G. Dread risk, September 11, and fatal traffic accidents. *Psychological science*. 2004;15(4):286-7.
21. Veldwijk J, Essers BAB, Lambooij MS, Dirksen CD, Smit HA, de Wit GA. Survival or Mortality: Does Risk Attribute Framing Influence Decision-Making Behavior in a Discrete Choice Experiment? *Value in Health*. 2016;19(2):202-9.
22. Akl EA, Oxman AD, Herrin J, Vist GE, Terrenato I, Sperati F, et al. Framing of health information messages. *The Cochrane database of systematic reviews*. 2011(12):Cd006777.
23. Mason M. Sample Size and Saturation in PhD Studies Using Qualitative Interviews. 2010. 2010;11(3).



- 1
- 2
- 3
- 4 24. Braun V, Clarke V. Using thematic analysis in psychology. *Qualitative Research in Psychology*. 2006;3(2):77-101.
- 5
- 6 25. QSR, International, Pty, Ltd. NVivo Qualitative Data Analysis Software Version 10. 2012.
- 7 26. Riley R, Coghill N, Montgomery A, Feder G, Horwood J. The provision of NHS health checks in
- 8 a community setting: an ethnographic account. *BMC health services research*. 2015;15:546.
- 9 27. Ellis N, Gidlow C, Cowap L, Randall J, Iqbal Z, Kumar J. A qualitative investigation of non-
- 10 response in NHS health checks. *Archives of Public Health*. 2015;73(1):1-8.
- 11 28. Jenkinson CE, Asprey A, Clark CE, Richards SH. Patients' willingness to attend the NHS
- 12 cardiovascular health checks in primary care: a qualitative interview study. *BMC Fam Pract*.
- 13 2015;16:33.
- 14 29. Burgess C, Wright AJ, Forster AS, Dodhia H, Miller J, Fuller F, et al. Influences on individuals'
- 15 decisions to take up the offer of a health check: a qualitative study. *Health Expect*. 2015;18(6):2437-
- 16 48.
- 17 30. Shaw RL, Pattison HM, Holland C, Cooke R. Be SMART: examining the experience of
- 18 implementing the NHS Health Check in UK primary care. *BMC Fam Pract*. 2015;16:1.
- 19 31. van Steenkiste B, van der Weijden T, Timmermans D, Vaes J, Stoffers J, Grol R. Patients'
- 20 ideas, fears and expectations of their coronary risk: barriers for primary prevention. *Patient*
- 21 *Education and Counseling*. 2004;55(2):301-7.
- 22 32. Lupton D. Risk as Moral Danger: The Social and Political Functions of Risk Discourse in Public
- 23 Health. *International Journal of Health Services*. 1993;23(3):425-35.
- 24 33. Dalton A, Bottle R, Okoro C, Majeed F, Millett C. Uptake of the NHS health checks
- 25 programme in a deprived, culturally diverse setting: cross sectional study. *J Epidemiol Commun H*.
- 26 2011;65.
- 27 34. Dryden R, Williams B, McCowan C, Themessl-Huber M. What do we know about who does
- 28 and does not attend general health checks? findings from a narrative scoping review. *BMC Public*
- 29 *Health*. 2012;12.
- 30 35. Robb N, Greenhalgh T. "You have to cover up the words of the doctor": The mediation of
- 31 trust in interpreted consultations in primary care. *Journal of Health Organization and Management*.
- 32 2006;20(5):434-55.
- 33 36. Greenhalgh T, Collard A, Campbell-Richards D, Vijayaraghavan S, Malik F, Morris J, et al.
- 34 Storylines of Self-Management: Narratives of People with Diabetes from a Multiethnic Inner City
- 35 Population. *Journal of Health Services Research & Policy*. 2011;16(1):37-43.
- 36
- 37
- 38
- 39
- 40
- 41
- 42
- 43
- 44
- 45
- 46
- 47
- 48
- 49
- 50
- 51
- 52
- 53
- 54
- 55
- 56
- 57
- 58
- 59
- 60

1  
2  
3 **List of figures**  
4

5 *Figure 1: Risk Report*  
6

7 *Box 1: Topic Guide*  
8

9 *Table 1: Characteristics of sample*  
10

11 *Table 2: Thematic framework*  
12  
13  
14  
15  
16  
17  
18  
19  
20  
21  
22  
23  
24  
25  
26  
27  
28  
29  
30  
31  
32  
33  
34  
35  
36  
37  
38  
39  
40  
41  
42  
43  
44  
45  
46  
47  
48  
49  
50  
51  
52  
53  
54  
55  
56  
57  
58  
59  
60

For peer review only



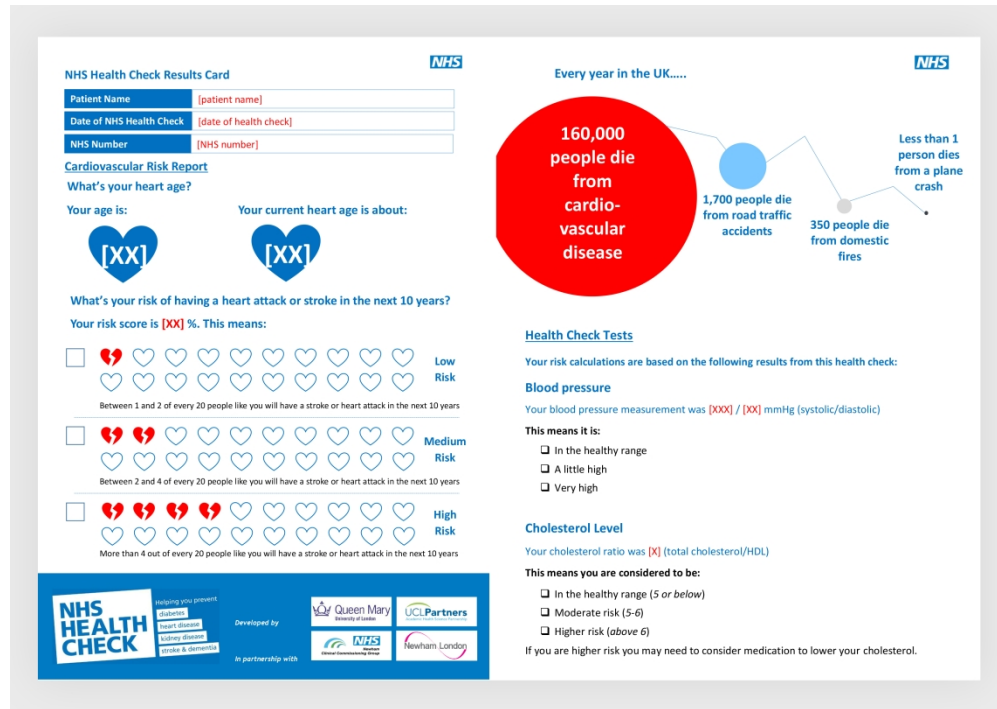

Figure 1: Risk Report

297x209mm (300 x 300 DPI)

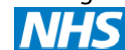

# NHS Health Check Results Card

|                                 |                        |
|---------------------------------|------------------------|
| <b>Patient Name</b>             | [patient name]         |
| <b>Date of NHS Health Check</b> | [date of health check] |
| <b>NHS Number</b>               | [NHS number]           |

## Cardiovascular Risk Report

### What's your heart age?

Your age is:

Your current heart age is about:

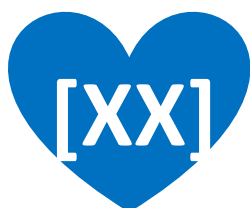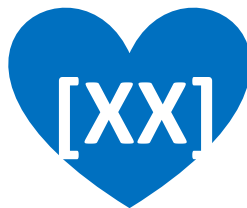

### What's your risk of having a heart attack or stroke in the next 10 years?

Your risk score is [XX] %. This means:

**Low Risk**

Between 1 and 2 of every 20 people like you will have a stroke or heart attack in the next 10 years

**Medium Risk**

Between 2 and 4 of every 20 people like you will have a stroke or heart attack in the next 10 years

**High Risk**

More than 4 out of every 20 people like you will have a stroke or heart attack in the next 10 years

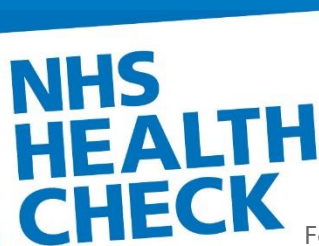

Helping you prevent

- diabetes
- heart disease
- kidney disease
- stroke & dementia

Developed by

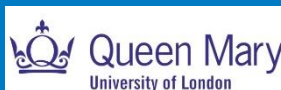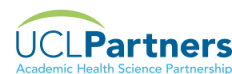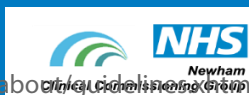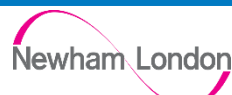

## Every year in the UK.....

**160,000**  
people die  
from  
cardio-  
vascular  
disease

**1,700** people die  
from road traffic  
accidents

**350** people die  
from domestic  
fires

**Less than 1**  
person dies  
from a plane  
crash

### Health Check Tests

Your risk calculations are based on the following results from this health check:

#### Blood pressure

Your blood pressure measurement was [XXX] / [XX] mmHg (systolic/diastolic)

#### This means it is:

- In the healthy range
- A little high
- Very high

#### Cholesterol Level

Your cholesterol ratio was [X] (total cholesterol/HDL)

#### This means you are considered to be:

- In the healthy range (*5 or below*)
- Moderate risk (*5-6*)
- Higher risk (*above 6*)

If you are higher risk you may need to consider medication to lower your cholesterol.

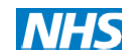

## Diabetes Check

Your glycated haemoglobin (HbA1c) result was [X.X] %

This means that you:

- Do not have diabetes (*less than 42*)
- Are at risk of developing diabetes (*42-47*)
- May have diabetes and will need to have further testing (*48 or over*)

## Body Mass Index

Your BMI was [XX]

This means that you are:

**White, Black African/Caribbean or other ethnic groups:**

- Healthy weight (*18.5 to less than 25*)
- Overweight (*25 to less than 30*)
- Obesity 1 (*30 to less than 35*)
- Obesity 2 (*35 to less than 40*)
- Obesity 3 (*40 or more*)

**South Asian or other Asian:**

- Healthy weight (*18.5 to less than 23*)
- Overweight (*23 to less than 27.5*)
- Obesity 1 (*27.5 to less than 32.5*)
- Obesity 2 (*32.5 to less than 37.5*)
- Obesity 3 (*37.5 or more*)

## You said you smoke [XX] cigarettes a day

66% of smokers would like to give up the habit. Giving up 20 premium brand cigarettes a day would save approximately £3,000 a year. You are up to four times more likely to quit if you use NHS support than if you go it alone.

All areas have a free local NHS Stop Smoking Service which can help you find your best way of stopping, providing the medication and support you need. Call 0300 123 1044 for more information.

## You said you drink [XX] units of alcohol per week

Cutting out a couple of large glasses of wine or beer each week could save you more than £400 year, as well as helping you to lose weight and get better quality sleep.

Drinking within recommended guidelines (no more than 14 units per week for men and women), not regularly drinking more 2-3 units a day, and having at least two alcohol free days per week will reduce your risk.

## Your Personal Action Plan

### Now that you know your cardiovascular risk and heart age, what can you do to improve it?

- Lose some weight

*Sign up to a weight loss programme, cut out foods and drinks with high levels of sugar and fats*

- Eat more healthily

*Eat your 5 a day, swap out sugary drinks for diet or sugar-free versions, choose wholegrain foods such as wholemeal bread and pasta and brown rice, cook using fresh ingredients at home*

- Do more exercise

*Sign up to a sports group or gym, take the stairs instead of lifts, walk and cycle to work*

- Reduce your blood pressure and cholesterol

*Grill, bake, steam and poach meat instead of frying or roasting, eat more fibre (wholegrains such as wholemeal bread and pasta and vegetables), eat less fatty meats, dairy foods, ghee and cakes and biscuits*

- Reduce your salt intake

*Add less salt to your cooking or plate, check labels on ready-made foods*

- Stop smoking

*Order your Smokefree quit kit today, save your cigarette money in a pot to see how it builds up*

- Reduce the amount of alcohol you drink

*Use smaller glasses or measures when pouring wine and spirits at home, have a few drink-free days each week, alternate alcoholic drinks with glasses of water, drink with a meal*

### What goal(s) would you like to set yourself?

### What small changes would help you achieve your goal(s)?

### When will you achieve this?

### Who can help you achieve this goal?

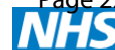

**For more information and support about how to achieve these goals, visit or call:**

- NHS Health Check w: [www.nhs.uk/Conditions/nhs-health-check](http://www.nhs.uk/Conditions/nhs-health-check)
- NHS free weight loss plan w: [www.nhs.uk/Livewell/weight-loss-guide](http://www.nhs.uk/Livewell/weight-loss-guide)
- Change for life w: [www.nhs.uk/change4life](http://www.nhs.uk/change4life) t: 0300 123 4567
- Smokefree NHS w: [www.nhs.uk/smokefree](http://www.nhs.uk/smokefree) t: 0300 123 1044
- NHS Alcohol information w: [www.nhs.uk/Livewell/alcohol](http://www.nhs.uk/Livewell/alcohol)
- Action on Salt w: [www.actiononsalt.org.uk](http://www.actiononsalt.org.uk) t: 020 7882 5941
- Diabetes w: [www.diabetes.co.uk](http://www.diabetes.co.uk)
- Dementia w: [www.alzheimers.org.uk](http://www.alzheimers.org.uk) t: 0300 222 1122

*What's good for the heart is good for the head*

**Treatment:**

After this health check, you may need a follow up appointment, and your doctor may prescribe you some medication to manage your risk of cardiovascular disease. You will be told by the clinic staff if you need to make another appointment.

**For every 20 potential strokes or heart attacks, treatment will prevent 7:**

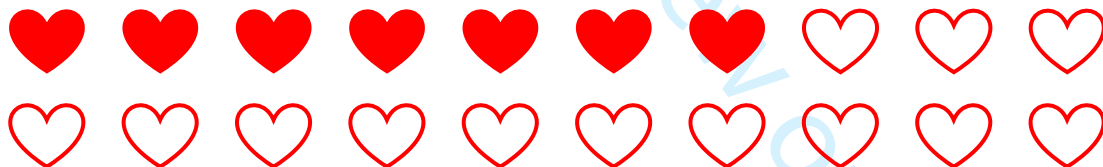

- Remember to take any prescribed treatment according to your doctor's instructions

*Set the alarm on your phone to remind you or put the pills next to your toothbrush*

**Extra information/ Local Support Groups:**

**Your next appointment will be due in.....**

**Table 1**

Consolidated criteria for reporting qualitative studies (COREQ): 32-item checklist

| No                                                 | Item                    | Guide questions/description                                 |                                                                                          | Page |
|----------------------------------------------------|-------------------------|-------------------------------------------------------------|------------------------------------------------------------------------------------------|------|
| <b>Domain 1:<br/>Research team and reflexivity</b> |                         |                                                             |                                                                                          |      |
| Personal Characteristics                           |                         |                                                             |                                                                                          |      |
| 1.                                                 | Interviewer/facilitator | Which author/s conducted the interview or focus group?      | MKDH                                                                                     | 5    |
| 2.                                                 | Credentials             | What were the researcher's credentials? <i>E.g. PhD, MD</i> | MPH, BSc                                                                                 | 1    |
| 3.                                                 | Occupation              | What was their occupation at the time of the study?         | Research assistant                                                                       | 1    |
| 4.                                                 | Gender                  | Was the researcher male or female?                          | F                                                                                        | 5    |
| 5.                                                 | Experience and training | What experience or training did the researcher have?        | Training in qualitative research and previous experience in health related communication | 5    |
| Relationship with participants                     |                         |                                                             |                                                                                          |      |

| No                            | Item                                     | Guide questions/description                                                                                                                                     |                                                                                                                                      | Page |
|-------------------------------|------------------------------------------|-----------------------------------------------------------------------------------------------------------------------------------------------------------------|--------------------------------------------------------------------------------------------------------------------------------------|------|
| 6.                            | Relationship established                 | Was a relationship established prior to study commencement?                                                                                                     | No                                                                                                                                   | 5    |
| 7.                            | Participant knowledge of the interviewer | What did the participants know about the researcher? e.g. <i>personal goals, reasons for doing the research</i>                                                 | Participants were informed that MKDH was a university researcher conducting a study                                                  | 5    |
| 8.                            | Interviewer characteristics              | What characteristics were reported about the interviewer/facilitator? e.g. <i>Bias, assumptions, reasons and interests in the research topic</i>                | Informed MKDH was interested in improving NHS Health Checks                                                                          | 5    |
| <b>Domain 2: study design</b> |                                          |                                                                                                                                                                 |                                                                                                                                      |      |
| Theoretical framework         |                                          |                                                                                                                                                                 |                                                                                                                                      |      |
| 9.                            | Methodological orientation and Theory    | What methodological orientation was stated to underpin the study? e.g. <i>grounded theory, discourse analysis, ethnography, phenomenology, content analysis</i> | Inductive thematic analysis with coding of transcripts according to latent and manifest content and developing a thematic framework. | 6    |



| No                    | Item                         | Guide questions/description                                                               |                                    | Page |
|-----------------------|------------------------------|-------------------------------------------------------------------------------------------|------------------------------------|------|
| Participant selection |                              |                                                                                           |                                    |      |
| 10.                   | Sampling                     | How were participants selected? <i>e.g. purposive, convenience, consecutive, snowball</i> | Purposive maximum diversity sample | 5    |
| 11.                   | Method of approach           | How were participants approached? <i>e.g. face-to-face, telephone, mail, email</i>        | Mail and face to face              | 5    |
| 12.                   | Sample size                  | How many participants were in the study?                                                  | 18                                 | 6    |
| 13.                   | Non-participation            | How many people refused to participate or dropped out? Reasons?                           | None                               | 6    |
| Setting               |                              |                                                                                           |                                    |      |
| 14.                   | Setting of data collection   | Where was the data collected? <i>e.g. home, clinic, workplace</i>                         | General practice clinic            | 5    |
| 15.                   | Presence of non-participants | Was anyone else present besides the participants and researchers?                         | No one                             | 5    |
| 16.                   | Description of sample        | What are the important characteristics of the sample? <i>e.g. demographic data, date</i>  | Demographic                        | 7    |
| Data collection       |                              |                                                                                           |                                    |      |
| 17.                   | Interview guide              | Were questions, prompts, guides                                                           | Pilot tested                       | 5/6  |

| No                                          | Item                   | Guide questions/description                                              | Page                                                                                                                              |
|---------------------------------------------|------------------------|--------------------------------------------------------------------------|-----------------------------------------------------------------------------------------------------------------------------------|
|                                             |                        | provided by the authors? Was it pilot tested?                            | The topic guide [box 1] was piloted, used open questions and probes to gather more detail, and was adapted as new themes emerged. |
| 18.                                         | Repeat interviews      | Were repeat interviews carried out? If yes, how many?                    | No 5                                                                                                                              |
| 19.                                         | Audio/visual recording | Did the research use audio or visual recording to collect the data?      | Yes audio recording 5                                                                                                             |
| 20.                                         | Field notes            | Were field notes made during and/or after the interview or focus group?  | Yes 5                                                                                                                             |
| 21.                                         | Duration               | What was the duration of the interviews or focus group?                  | 10-40 minutes 5                                                                                                                   |
| 22.                                         | Data saturation        | Was data saturation discussed?                                           | Yes 5                                                                                                                             |
| 23.                                         | Transcripts returned   | Were transcripts returned to participants for comment and/or correction? | No 5                                                                                                                              |
| <b>Domain 3:<br/>analysis and findingsz</b> |                        |                                                                          |                                                                                                                                   |

| No            | Item                           | Guide questions/description                                                                                                              |                                     | Page |
|---------------|--------------------------------|------------------------------------------------------------------------------------------------------------------------------------------|-------------------------------------|------|
| Data analysis |                                |                                                                                                                                          |                                     |      |
| 24.           | Number of data coders          | How many data coders coded the data?                                                                                                     | 2                                   | 6    |
| 25.           | Description of the coding tree | Did authors provide a description of the coding tree?                                                                                    | No                                  | 6    |
| 26.           | Derivation of themes           | Were themes identified in advance or derived from the data?                                                                              | Derived from data                   | 6    |
| 27.           | Software                       | What software, if applicable, was used to manage the data?                                                                               | NVIVO 10                            | 6    |
| 28.           | Participant checking           | Did participants provide feedback on the findings?                                                                                       | No                                  | 6    |
| Reporting     |                                |                                                                                                                                          |                                     |      |
| 29.           | Quotations presented           | Were participant quotations presented to illustrate the themes / findings? Was each quotation identified? e.g. <i>participant number</i> | Yes; each participant is identified | 7-11 |
| 30.           | Data and findings consistent   | Was there consistency between the data presented and the findings?                                                                       | Yes                                 | 7-11 |
| 31.           | Clarity of major themes        | Were major themes clearly presented in the findings?                                                                                     | Yes                                 | 7    |

| No  | Item                    | Guide questions/description                                                | Page |
|-----|-------------------------|----------------------------------------------------------------------------|------|
| 32. | Clarity of minor themes | Is there a description of diverse cases or discussion of minor themes? Yes | 11   |

For peer review only
